# Supplementary material
Source: PubMed Central journal article supplement (PMC4010198)
Supplement: NIHMS560365-supplement-01.pdf [file NIHMS560365-supplement-01.pdf]

1  
2  
3  
4                    **Wang et al. “Arginylation of intact proteins in vivo involves a novel type of**  
5  
6                    **Arg linkage to amino acid side chains.”**  
7  
8  
9

10  
11                    **SUPPLEMENTAL ONLINE INFORMATION**  
12  
13

14  
15                    **Experimental Procedures.**  
16  
17  
18  
19  
20

21                    **Escherichia coli strains, Miscellaneous Reagents and Animal Care.** BL21-  
22  
23 CodonPlus® (DE3)-RIL and BL21(DE3) were purchased from Stratagene (USA). The  
24  
25 recombinant mouse ATE1 isoforms and Escherichia coli Arginy-tRNA synthetase (RRS)  
26  
27 were purified as previously described [13]. The care and treatment of mice were  
28  
29 performed in accordance with the relevant National Institutes of Health (NIH) guidelines.  
30  
31

32  
33                    **Peptides.** Human angiotensin II (A9525) was purchased from Sigma; Acetylated  
34  
35 and non-acetylated actin N-terminal peptide were synthesized by Dr. Henry Zebroski at  
36  
37 the Rockefeller University Proteomics Resource Center; non-arginylated long actin N-  
38  
39 terminal peptide, DN, DN-Me, and DN-All were synthesized by Genscript.  
40  
41

42  
43                    **In vitro arginylation of peptides.** In vitro arginylation reaction of peptides by  
44  
45 ATE1 was modified from [13]. A typical reaction was performed in 100 µl volume,  
46  
47 containing 50 mM Hepes, pH 7.5, 25 mM KCl, 15 mM MgCl<sub>2</sub>, 0.1 mM DTT, 3 mM  
48  
49 ATP, 1 mM Arginine, 100 µM tRNA-Arg from E.coli (Chemical Block), 6 µM RRS, 3  
50  
51 µM ATE1 and 100 µM peptide substrate. Reaction was mixed and incubated at 37 °C for  
52  
53 1 hour, followed by heating at 95°C for 15 min, cooling down on ice for 20 min, and  
54  
55 spinning at 13,000 rpm for 15 min in a tabletop microfuge. The supernatants were loaded  
56  
57  
58  
59  
60  
61  
62  
63  
64  
65

1  
2  
3  
4 onto C18 spin columns (The Nest Group, Inc.) prewashed with 100% acetonitrile and  
5  
6 water, then washed with 0.1% trifluoroacetic acid (TFA) and eluted with 60%  
7  
8 acetonitrile/0.1% TFA in water. The eluted peptide was dried with speed vacuum and re-  
9  
10 dissolved in 0.1% TFA in water for further analysis. L-[<sup>13</sup>C,<sup>15</sup>N]-Arginine (Pierce) was  
11  
12 used for arginylation of peptides for mass spectrometry and NMR, and L-Arginine  
13  
14 (Sigma) was used for Edman sequencing. For NMR analysis, arginylated peptides were  
15  
16 further purified by HPLC, lyophilized, and dissolved in 20 mM K<sub>2</sub>HPO<sub>4</sub>/KH<sub>2</sub>PO<sub>4</sub> buffer,  
17  
18 pH 6.0 and adjusted to the concentration to 1mM. To evaluate the arginylation efficiency,  
19  
20 12.5 μM L-[2,3,4-<sup>3</sup>H]-Arginine (PerkinElmer) instead of “cold” arginine was used in the  
21  
22 reaction and the concentrations of tRNA<sup>Arg</sup> and peptides were adjusted to 50 μM. After  
23  
24 purification with C18 spin columns, arginylated peptides were counted in a liquid  
25  
26 scintillation counter and evaluated as counts per minute (cpm) of [<sup>3</sup>H]-Arg.  
27  
28  
29  
30  
31  
32

33 **Mass spectrometry and database searches.** Sample preparation and tandem  
34  
35 MS/MS were performed as previously described [2, 14]. Protein identification was  
36  
37 performed with Integrated Proteomics Pipeline - IP2 (Integrated Proteomics Applications,  
38  
39 Inc., San Diego, CA. <http://www.integratedproteomics.com/>) using ProLuCID and  
40  
41 DTASelect2 [14]. Spectrum raw files were extracted into ms1 and ms2 files from raw  
42  
43 files using RawExtract 1.9.9 (<http://fields.scripps.edu/downloads.php>) [15], and the  
44  
45 tandem mass spectra were searched against NCBI RefSeq protein database  
46  
47 (<http://www.ncbi.nlm.nih.gov/refseq/>, downloaded on May 17, 2010). In order to  
48  
49 accurately estimate peptide probabilities and false discovery rates, we used a decoy  
50  
51 database containing the reversed sequences of all the proteins appended to the target  
52  
53 database. Tandem mass spectra were matched to sequences using the ProLuCID  
54  
55  
56  
57  
58  
59  
60  
61  
62  
63  
64  
65

1  
2  
3  
4 algorithm with 50 ppm peptide mass tolerance. ProLuCID searches were done on an Intel  
5  
6  
7 Xeon cluster running under the Linux operating system. The search space included all  
8  
9 fully tryptic peptide candidates that fell within the mass tolerance window with maximum  
10  
11 2 miscleavages. Carbamidomethylation (+57.02146 Da) of cysteine was considered as a  
12  
13 static modification, arginylation (+156.1011 or + 166.1093) on Aspartic acid and  
14  
15  
16 Glutamic acid residues were considered as variable modifications.  
17  
18

19 The validity of peptide/spectrum matches (PSMs) was assessed with DTASelect2  
20  
21 using two SEQUEST defined parameters, the cross-correlation score (XCORR), and  
22  
23 normalized difference in cross-correlation scores (DeltaCN). The search results were  
24  
25 grouped by charge state (+1, +2, +3, and greater than +3) and tryptic status (fully tryptic,  
26  
27 half-tryptic, and non-tryptic), resulting in 12 distinct sub-groups. In each one of these  
28  
29 sub-groups, the distribution of XCORR, DeltaCN, and DeltaMass values for (a) direct and  
30  
31 (b) decoy database PSMs was obtained, then the direct and decoy subsets were separated  
32  
33 by discriminant analysis. Full separation of the direct and decoy PSM subsets is not  
34  
35 generally possible; therefore, peptide match probabilities were calculated based on a  
36  
37 nonparametric fit of the direct and decoy score distributions. A peptide confidence of  
38  
39 95% was set as the minimum threshold and only peptides with delta mass less than 5 ppm  
40  
41 were accepted. The false discovery rate was calculated as the percentage of reverse decoy  
42  
43 PSMs among all the PSMs that passed the 95% confidence threshold. After this last  
44  
45 filtering step, we estimate that the peptide false discovery rates were below 1%. See [14]  
46  
47  
48 for further details on manual data validation.  
49  
50  
51  
52  
53

54  
55 **Subtractive Edman degradation.** For the Edman reaction, the  
56  
57 phenylisothiocyanate (PITC) was purchased from Pierce. All other reagents were from  
58  
59  
60  
61  
62  
63  
64  
65

1  
2  
3  
4 Sigma Aldrich. The peptide was initially dissolved in 50% aqueous pyridine and then an  
5  
6 equal volume of 5% PITC in pyridine was added. The coupling reaction was performed  
7  
8 by heating for 10 minutes at 50 degrees Celsius. Extractions were performed twice with  
9  
10 2:1 heptane/ethyl acetate solution and then lyophilized. Cleavage was performed using  
11  
12 anhydrous TFA and the reaction was performed for 5 minutes at 37 degrees Celsius and  
13  
14 then lyophilized. The peptide was dissolved in water and two volumes of n-butyl acetate  
15  
16 were added. The mixture was shaken and the acetate layer was removed after separation.  
17  
18  
19 The peptide was lyophilized prior to mass spectrometry analysis.  
20  
21  
22

23           **NMR experiments.** All NMR spectra were recorded on a Bruker Avance II 600  
24  
25 MHz NMR spectrometer, equipped with a Bruker TCI triple resonance cryoprobe. All  
26  
27 NMR samples were prepared by dissolving the lyophilized compounds in a buffer with  
28  
29 50 mM sodium phosphate, 50 mM NaCl, and pH 6.3. The concentrations of the samples  
30  
31 were around 0.5 mM. The spectra were recorded with Bruker Topspin standard pulse  
32  
33 sequences at 25 °C, and the spectra were processed with Bruker Topspin software based  
34  
35 on the manufacture suggestions.  
36  
37  
38  
39

40           **Analysis of the sequence context around the arginylated sites.** Sequence  
41  
42 fragments of specified lengths (+/- 5, 10 or 20 positions) around the arginylated sites  
43  
44 were extracted from the database and the overlapping fragments (resulting from closely  
45  
46 located sites) were merged together. Frequencies of occurrence of each amino acid in the  
47  
48 vicinity of the arginylated sites were compared to those in the full-length proteins; the  
49  
50 significance of the deviation for each amino acid was estimated using the binomial  
51  
52 approximation with Bonferroni correction (binomial p-values were multiplied by a factor  
53  
54  
55  
56  
57  
58  
59  
60  
61  
62  
63  
64  
65

1  
2  
3  
4 of 20 to account for comparison of 20 amino acids). To avoid bias, titin, the longest  
5  
6  
7 protein in the mouse genome, was excluded from the analysis.  
8

9           **Statistical analysis.** Calculation of standard deviation (SD) and standard error of  
10  
11 mean (S.E.M.) was based on Student's t-distribution.  
12  
13  
14  
15  
16  
17  
18  
19  
20  
21  
22  
23  
24  
25  
26  
27  
28  
29  
30  
31  
32  
33  
34  
35  
36  
37  
38  
39  
40  
41  
42  
43  
44  
45  
46  
47  
48  
49  
50  
51  
52  
53  
54  
55  
56  
57  
58  
59  
60  
61  
62  
63  
64  
65

1  
2  
3  
4 **Supplemental Figure and Table Legends.**  
5  
6  
7  
8  
9

10 **Figure S1 (related to Figure 2).** Normalized side chain incorporation of Arg into  
11 a standard peptide in the presence and absence of tRNA. Error bar represents SEM, n=3  
12  
13

14  
15 **Figure S2 (related to Figures 2 and 3).** MALDI TOF spectrograms showing the  
16 standard enzymatically arginylated peptide (R)-DDIAALVVDNGSGMCK before (left)  
17 and after (right) the first Edman degradation cycle. The peptide mass has reduced by one  
18 Arg, confirming its N-terminal linkage to the peptide.  
19  
20  
21  
22  
23

24 **Figure S3 (related to Figure 3).** Colorimetric assay with Aminopeptidase B in  
25 the absence (red) and presence (green) of the inhibitor Bestatin.  
26  
27  
28  
29  
30

31  
32 **Supplemental Table 1 (related to Figure 1 and Table 1).** Protein sites  
33 arginylated in vivo on the side chains of Asp and Glu showing the homology of these  
34 sites to other isoforms of the identified proteins.  
35  
36  
37  
38  
39

40  
41 **Supplemental Table 2 (related to Figure 1 and Table 1).** Parameters of the  
42 identified peptides.  
43  
44  
45

46  
47 **Supplemental Table 3 (related to Figure 1 and Table 1).** Frequencies of amino  
48 acid occurrence within 5, 10, and 20 flanking residues to the arginylation sites.  
49  
50  
51

52  
53 **Supplemental Dataset (related to Figure 1 and Table 1).** Mass spectra of the  
54 identified side chain arginylated peptides.  
55  
56  
57  
58  
59  
60  
61  
62  
63  
64  
65

1  
2  
3  
4 Wang\_et\_al\_Supplemental Figure 1  
5  
6  
7  
8

9 **RDDIAALVVDNGSGMCK**

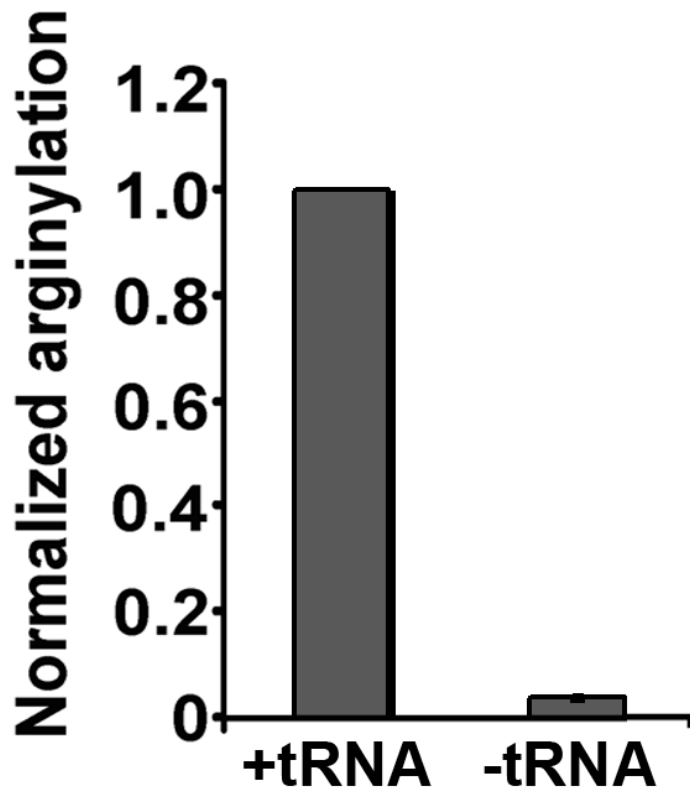

1  
2  
3  
4 **Wang\_et\_al\_Supplemental Figure 2**  
5  
6  
7  
8  
9

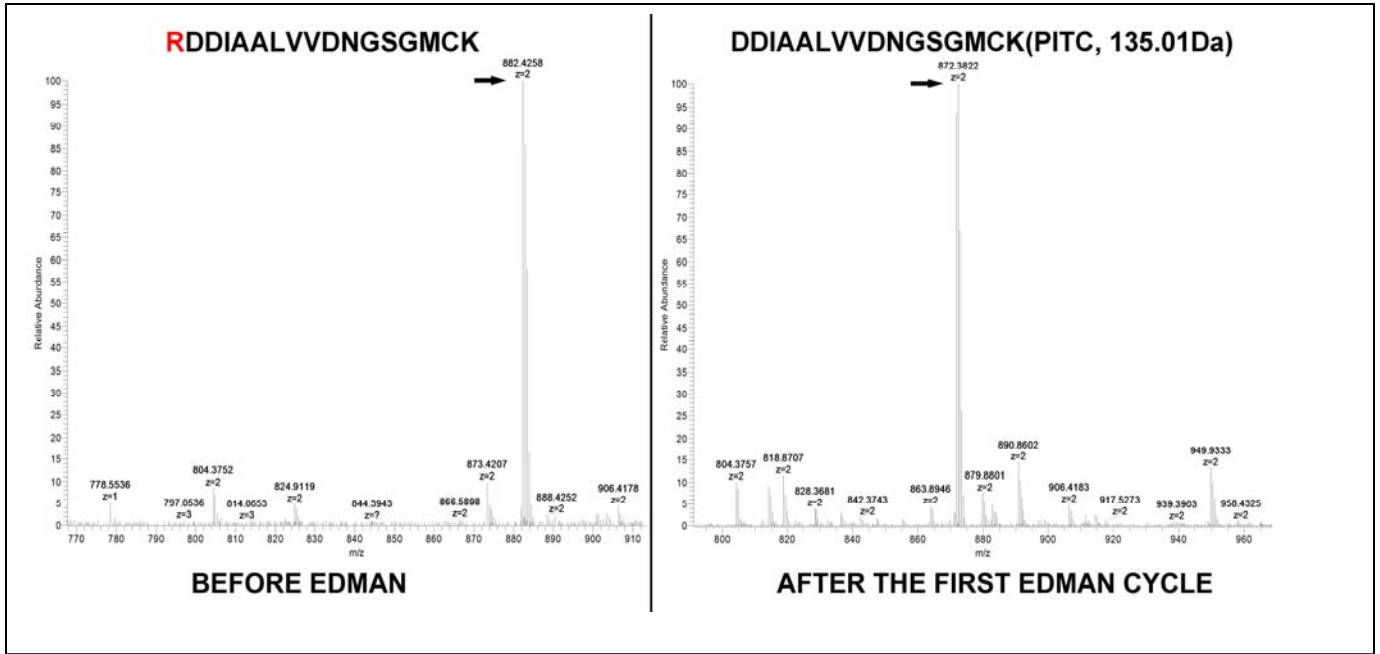

10  
11  
12  
13  
14  
15  
16  
17  
18  
19  
20  
21  
22  
23  
24  
25  
26  
27  
28  
29  
30  
31  
32  
33  
34  
35  
36  
37  
38  
39  
40  
41  
42  
43  
44  
45  
46  
47  
48  
49  
50  
51  
52  
53  
54  
55  
56  
57  
58  
59  
60  
61  
62  
63  
64  
65



Wang\_et\_al\_Supplemental\_Figure\_3

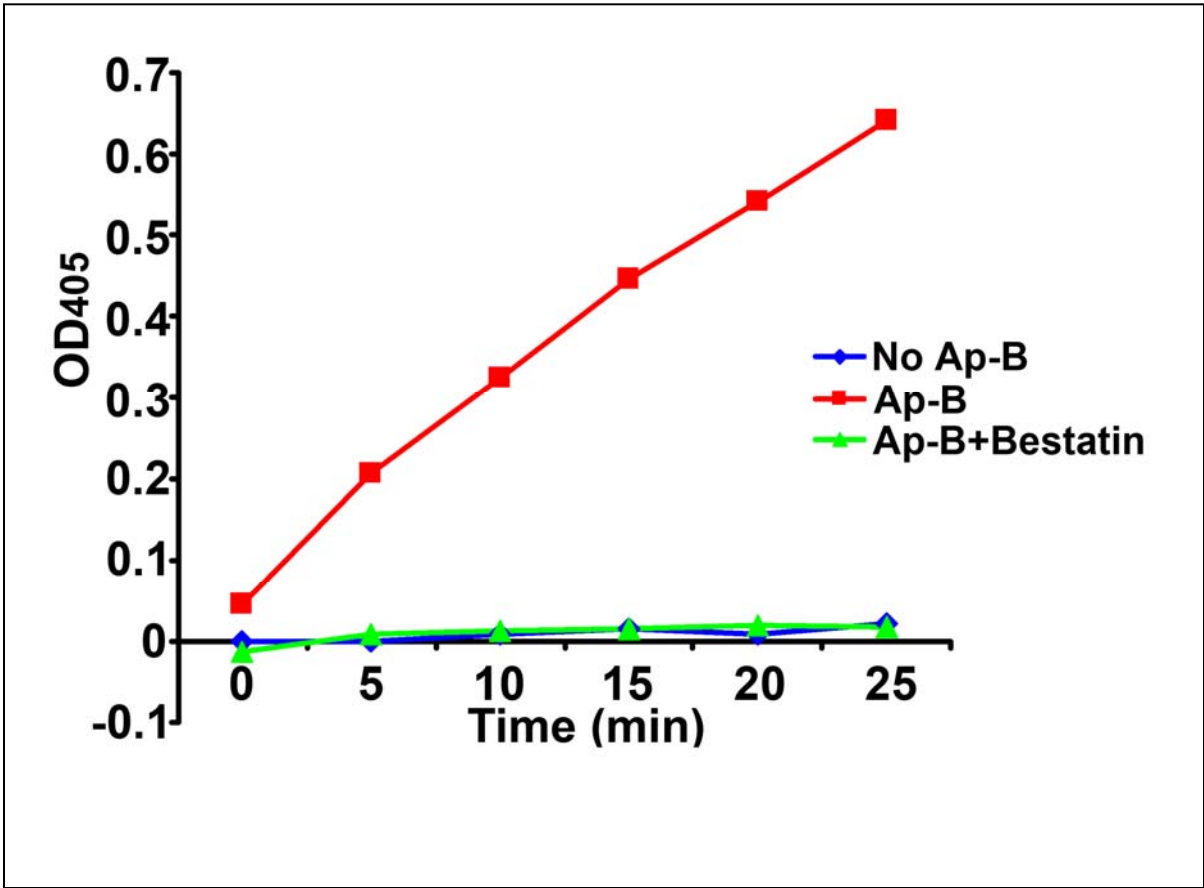

1  
2  
3  
4  
5  
6  
7  
8  
9  
10  
11  
12  
13  
14  
15  
16  
17  
18  
19  
20  
21  
22  
23  
24  
25  
26  
27  
28  
29  
30  
31  
32  
33  
34  
35  
36  
37  
38  
39  
40  
41  
42  
43  
44  
45  
46  
47  
48  
49  
50  
51  
52  
53  
54  
55  
56  
57  
58  
59  
60  
61  
62  
63  
64  
65

**SUPPLEMENTAL DATASET**

**Mass spectra of the side chain arginylated peptides identified in vivo.**

TTGIVLDSGDGVTHNVPIY EGYALPHAIMR, MH+ 3352.7107, m/z 1118.2417

File: myofibril-10, Scan: 7201, Precursor m/z: 1118.5782, Charge: 3

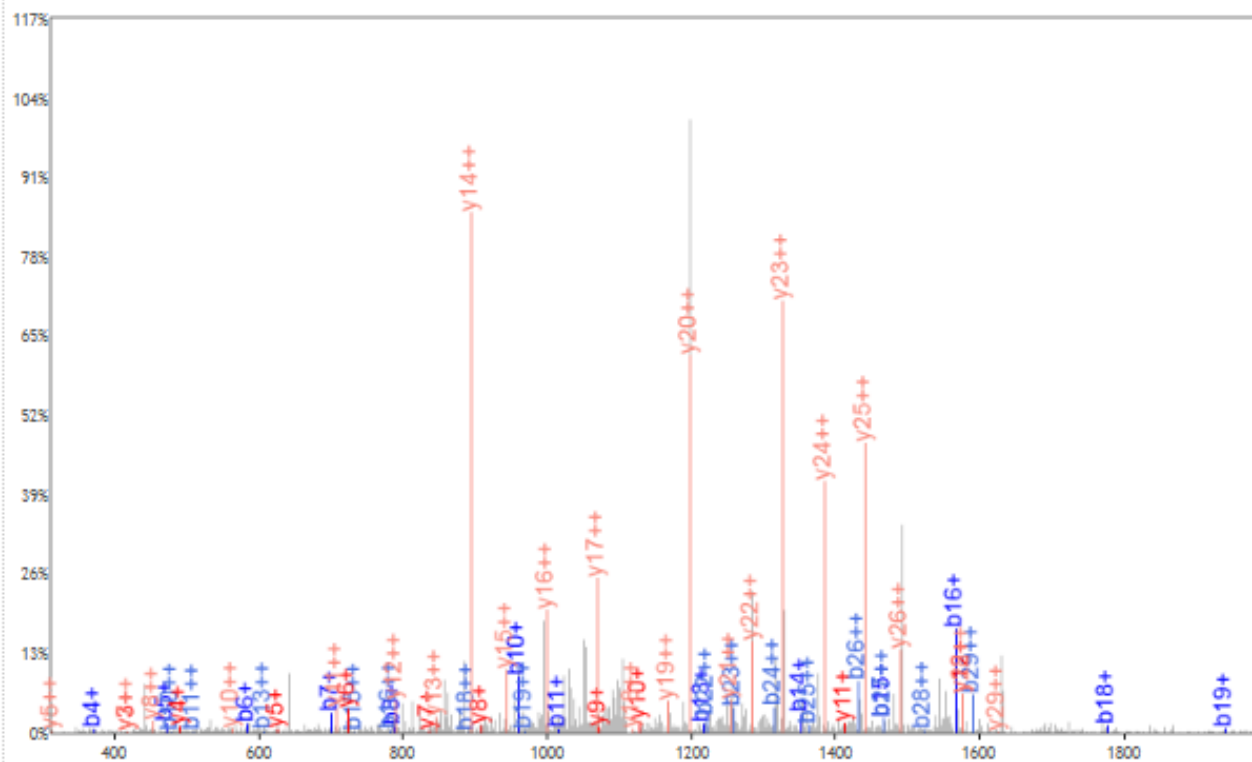

| b+        | b2+       | #  | Seq # | y+        | y2+       |
|-----------|-----------|----|-------|-----------|-----------|
| 102.0550  | 51.5311   | 1  | T 30  |           |           |
| 203.1026  | 102.0550  | 2  | T 29  | 3251.6630 | 1626.3351 |
| 260.1241  | 130.5657  | 3  | G 28  | 3150.6153 | 1575.8113 |
| 373.2082  | 187.1077  | 4  | I 27  | 3093.5938 | 1547.3006 |
| 472.2766  | 236.6419  | 5  | V 26  | 2980.5098 | 1490.7585 |
| 585.3606  | 293.1840  | 6  | L 25  | 2881.4414 | 1441.2243 |
| 700.3876  | 350.6974  | 7  | D 24  | 2768.3573 | 1384.6823 |
| 787.4196  | 394.2134  | 8  | S 23  | 2653.3304 | 1327.1688 |
| 844.4411  | 422.7242  | 9  | G 22  | 2566.2983 | 1283.6528 |
| 959.4680  | 480.2376  | 10 | D 21  | 2509.2769 | 1255.1421 |
| 1016.4895 | 508.7484  | 11 | G 20  | 2394.2499 | 1197.6286 |
| 1115.5579 | 558.2826  | 12 | V 19  | 2337.2285 | 1169.1179 |
| 1216.6056 | 608.8064  | 13 | T 18  | 2238.1600 | 1119.5837 |
| 1353.6645 | 677.3359  | 14 | H 17  | 2137.1124 | 1069.0598 |
| 1467.7074 | 734.3573  | 15 | N 16  | 2000.0535 | 1000.5304 |
| 1566.7758 | 783.8916  | 16 | V 15  | 1886.0105 | 943.5089  |
| 1663.8286 | 832.4179  | 17 | P 14  | 1786.9421 | 893.9747  |
| 1776.9127 | 888.9600  | 18 | I 13  | 1689.8893 | 845.4483  |
| 1939.9760 | 970.4916  | 19 | Y 12  | 1576.8053 | 788.9063  |
| 2225.1197 | 1113.0635 | 20 | E 11  | 1413.7420 | 707.3746  |
| 2282.1411 | 1141.5742 | 21 | G 10  | 1128.5983 | 564.8028  |
| 2445.2045 | 1223.1059 | 22 | Y 9   | 1071.5768 | 536.2920  |
| 2516.2416 | 1258.6244 | 23 | A 8   | 908.5135  | 454.7604  |
| 2629.3256 | 1315.1665 | 24 | L 7   | 837.4764  | 419.2418  |
| 2726.3784 | 1363.6928 | 25 | P 6   | 724.3923  | 362.6998  |
| 2863.4373 | 1432.2223 | 26 | H 5   | 627.3395  | 314.1734  |
| 2934.4744 | 1467.7409 | 27 | A 4   | 490.2806  | 245.6439  |
| 3047.5585 | 1524.2829 | 28 | I 3   | 419.2435  | 210.1254  |
| 3178.5990 | 1589.8031 | 29 | M 2   | 306.1594  | 153.5834  |
|           |           | 30 | R 1   | 175.1190  | 88.0631   |

VAPEEHPHTLLTEAPLNPK, MH+ 2112.1448, m/z 704.7198

File: myofibril-7, Scan: 4750, Precursor m/z: 705.0561, Charge: 3

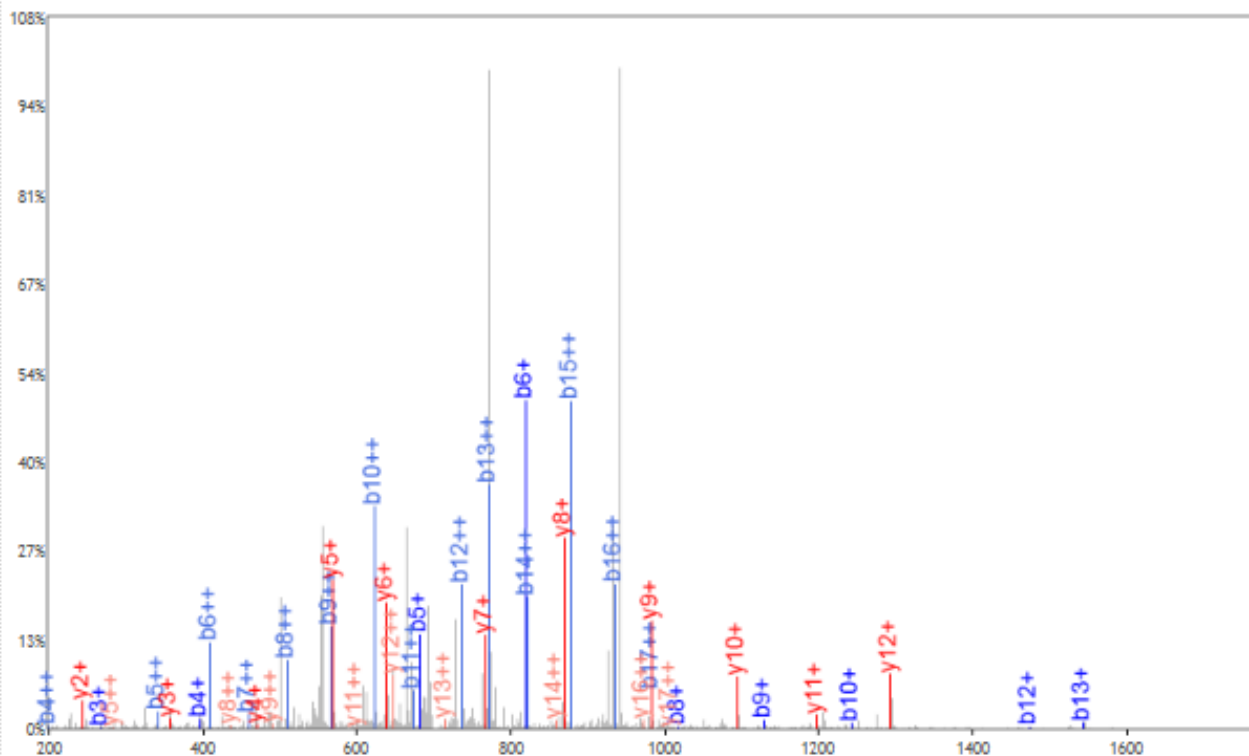

| b+        | b2+      | #  | Seq # | y+        | y2+       |
|-----------|----------|----|-------|-----------|-----------|
| 100.0757  | 50.5415  | 1  | V 18  |           |           |
| 171.1128  | 86.0600  | 2  | A 17  | 2013.0764 | 1007.0418 |
| 268.1656  | 134.5864 | 3  | P 16  | 1942.0392 | 971.5233  |
| 397.2082  | 199.1077 | 4  | E 15  | 1844.9865 | 922.9969  |
| 682.3519  | 341.6796 | 5  | E 14  | 1715.9439 | 858.4756  |
| 819.4108  | 410.2090 | 6  | H 13  | 1430.8002 | 715.9037  |
| 916.4635  | 458.7354 | 7  | P 12  | 1293.7413 | 647.3743  |
| 1017.5112 | 509.2592 | 8  | T 11  | 1196.6885 | 598.8479  |
| 1130.5953 | 565.8013 | 9  | L 10  | 1095.6408 | 548.3241  |
| 1243.6793 | 622.3433 | 10 | L 9   | 982.5568  | 491.7820  |
| 1344.7270 | 672.8671 | 11 | T 8   | 869.4727  | 435.2400  |
| 1473.7696 | 737.3884 | 12 | E 7   | 768.4250  | 384.7162  |
| 1544.8067 | 772.9070 | 13 | A 6   | 639.3824  | 320.1949  |
| 1641.8595 | 821.4334 | 14 | P 5   | 568.3453  | 284.6763  |
| 1754.9435 | 877.9754 | 15 | L 4   | 471.2926  | 236.1499  |
| 1868.9865 | 934.9969 | 16 | N 3   | 358.2085  | 179.6079  |
| 1966.0392 | 983.5233 | 17 | P 2   | 244.1656  | 122.5864  |
|           |          | 18 | K 1   | 147.1128  | 74.0600   |

[Click](#) to move table

Static Modifications:

C: 57.02146

Variable Modifications:

E: 156.1011

YPIEHGIITNWDDM**E**K, MH+ 2117.0120, m/z 706.3422

File: platelet-6, Scan: 5329, Precursor m/z: 706.3444, Charge: 3

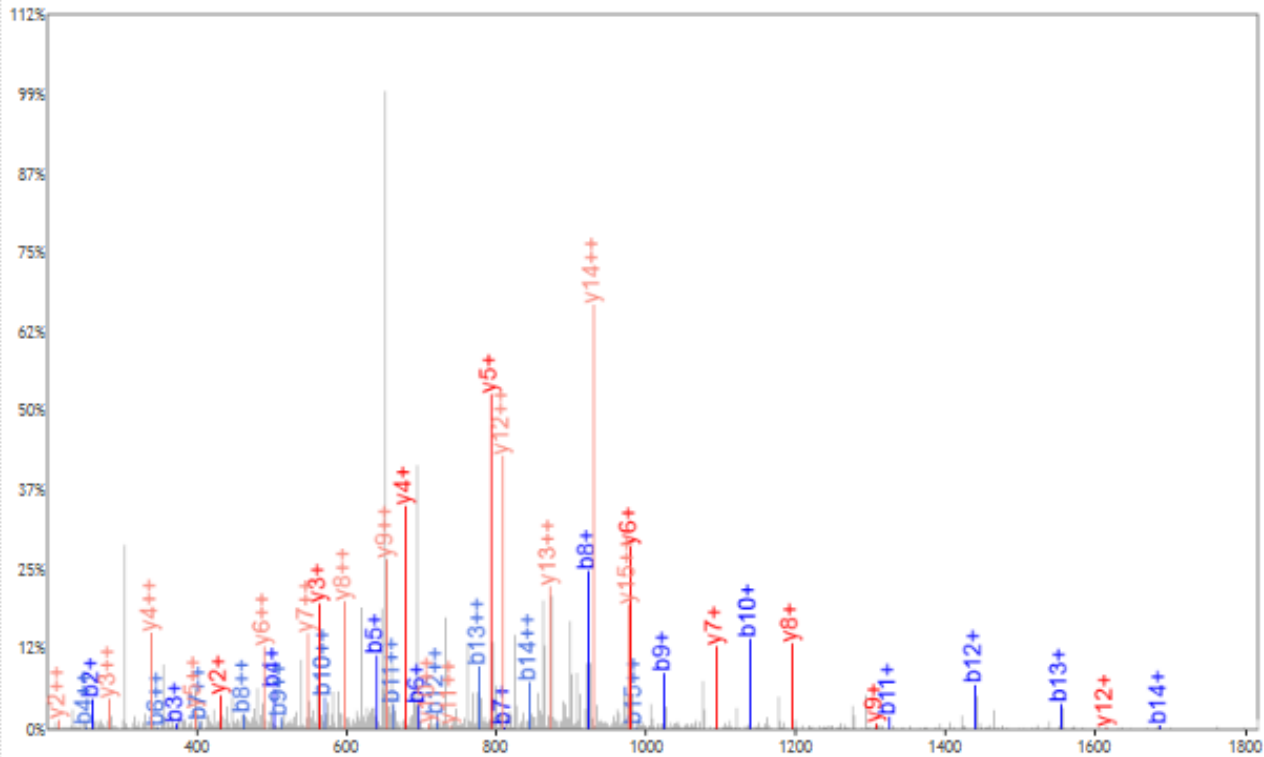

| b+        | b2+      | #  | Seq # | y+ | y2+                |
|-----------|----------|----|-------|----|--------------------|
| 164.0706  | 82.5389  | 1  | Y     | 16 |                    |
| 261.1234  | 131.0653 | 2  | P     | 15 | 1953.9487 977.4780 |
| 374.2074  | 187.6074 | 3  | I     | 14 | 1856.8959 928.9516 |
| 503.2500  | 252.1287 | 4  | E     | 13 | 1743.8119 872.4096 |
| 640.3089  | 320.6581 | 5  | H     | 12 | 1614.7693 807.8883 |
| 697.3304  | 349.1688 | 6  | G     | 11 | 1477.7104 739.3588 |
| 810.4145  | 405.7109 | 7  | I     | 10 | 1420.6889 710.8481 |
| 923.4985  | 462.2529 | 8  | I     | 9  | 1307.6049 654.3061 |
| 1024.5462 | 512.7767 | 9  | T     | 8  | 1194.5208 597.7640 |
| 1138.5891 | 569.7982 | 10 | N     | 7  | 1093.4731 547.2402 |
| 1324.6684 | 662.8379 | 11 | W     | 6  | 979.4302 490.2187  |
| 1439.6954 | 720.3513 | 12 | D     | 5  | 793.3509 397.1791  |
| 1554.7223 | 777.8648 | 13 | D     | 4  | 678.3239 339.6656  |
| 1685.7628 | 843.3850 | 14 | M     | 3  | 563.2970 282.1521  |
| 1970.9065 | 985.9569 | 15 | E     | 2  | 432.2565 216.6319  |
|           |          | 16 | K     | 1  | 147.1128 74.0600   |

[click] to move table

Static Modifications:

C: 57.02146

Variable Modifications:

E: 156.1011

TTGIVMDSGDGVTHTVPIY**E**GYALPHAILR, MH+ 3339.7154, m/z 1113.9100

File: platelet-10, Scan: 6444, Precursor m/z: 1114.247, Charge: 3

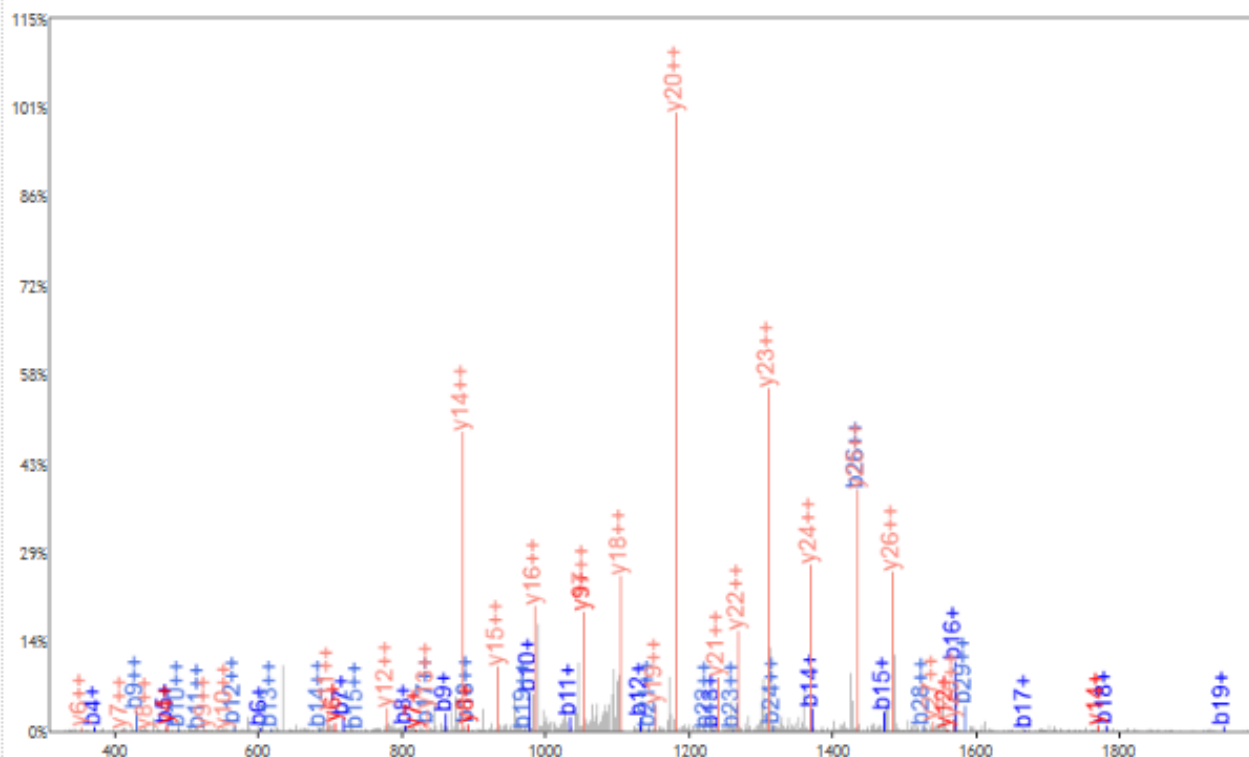

| b+        | b2+       | #  | Seq | #  | y+        | y2+       |
|-----------|-----------|----|-----|----|-----------|-----------|
| 102.0550  | 51.5311   | 1  | T   | 30 |           |           |
| 203.1026  | 102.0550  | 2  | T   | 29 | 3238.6677 | 1619.8375 |
| 260.1241  | 130.5657  | 3  | G   | 28 | 3137.6201 | 1569.3137 |
| 373.2082  | 187.1077  | 4  | I   | 27 | 3080.5986 | 1540.8029 |
| 472.2766  | 236.6419  | 5  | V   | 26 | 2967.5145 | 1484.2609 |
| 603.3171  | 302.1622  | 6  | M   | 25 | 2868.4461 | 1434.7267 |
| 718.3440  | 359.6756  | 7  | D   | 24 | 2737.4056 | 1369.2065 |
| 805.3760  | 403.1917  | 8  | S   | 23 | 2622.3787 | 1311.6930 |
| 862.3975  | 431.7024  | 9  | G   | 22 | 2535.3467 | 1268.1770 |
| 977.4244  | 489.2159  | 10 | D   | 21 | 2478.3252 | 1239.6662 |
| 1034.4459 | 517.7266  | 11 | G   | 20 | 2363.2982 | 1182.1528 |
| 1133.5143 | 567.2608  | 12 | V   | 19 | 2306.2768 | 1153.6420 |
| 1234.5620 | 617.7846  | 13 | T   | 18 | 2207.2084 | 1104.1078 |
| 1371.6209 | 686.3141  | 14 | H   | 17 | 2106.1607 | 1053.5840 |
| 1472.6686 | 736.8379  | 15 | T   | 16 | 1969.1018 | 985.0545  |
| 1571.7370 | 786.3721  | 16 | V   | 15 | 1868.0541 | 934.5307  |
| 1668.7898 | 834.8985  | 17 | P   | 14 | 1768.9857 | 884.9965  |
| 1781.8738 | 891.4406  | 18 | I   | 13 | 1671.9329 | 836.4701  |
| 1944.9372 | 972.9722  | 19 | Y   | 12 | 1558.8489 | 779.9281  |
| 2230.0808 | 1115.5441 | 20 | E   | 11 | 1395.7855 | 698.3964  |
| 2287.1023 | 1144.0548 | 21 | G   | 10 | 1110.6418 | 555.8246  |
| 2450.1656 | 1225.5865 | 22 | Y   | 9  | 1053.6204 | 527.3138  |
| 2521.2028 | 1261.1050 | 23 | A   | 8  | 890.5570  | 445.7822  |
| 2634.2868 | 1317.6470 | 24 | L   | 7  | 819.5199  | 410.2636  |
| 2731.3396 | 1366.1734 | 25 | P   | 6  | 706.4359  | 353.7216  |
| 2868.3985 | 1434.7029 | 26 | H   | 5  | 609.3831  | 305.1952  |
| 2939.4356 | 1470.2214 | 27 | A   | 4  | 472.3242  | 236.6657  |
| 3052.5197 | 1526.7635 | 28 | I   | 3  | 401.2871  | 201.1472  |
| 3165.6037 | 1583.3055 | 29 | L   | 2  | 288.2030  | 144.6051  |
|           |           | 30 | R   | 1  | 175.1190  | 88.0631   |

LL**E**TIDQLHLEFAK, MH+ 1826.0170, m/z 609.3439

File: myofibril-6, Scan: 7599, Precursor m/z: 609.6792, Charge: 3

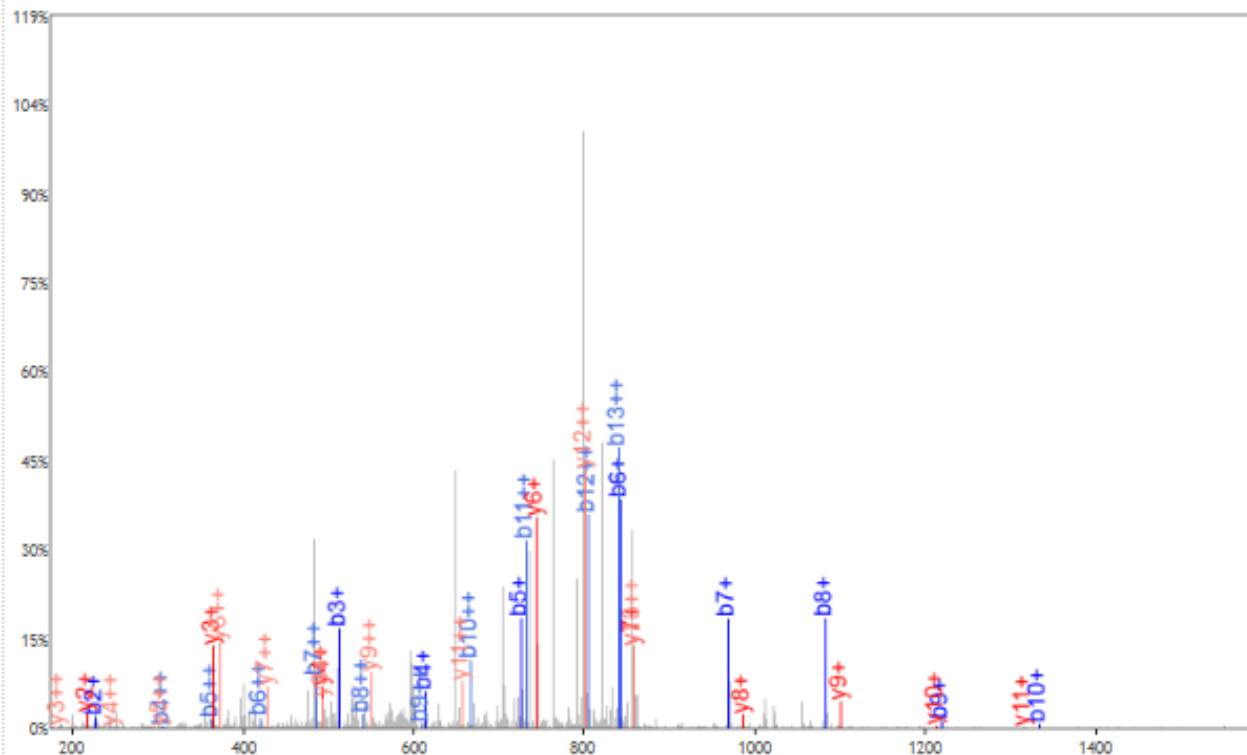

| b+        | b2+      | #  | Seq # | y+        | y2+      |
|-----------|----------|----|-------|-----------|----------|
| 114.0913  | 57.5493  | 1  | L 14  |           |          |
| 227.1754  | 114.0913 | 2  | L 13  | 1712.9330 | 856.9701 |
| 512.3191  | 256.6632 | 3  | E 12  | 1599.8489 | 800.4281 |
| 613.3668  | 307.1870 | 4  | T 11  | 1314.7052 | 657.8563 |
| 726.4508  | 363.7291 | 5  | I 10  | 1213.6575 | 607.3324 |
| 841.4778  | 421.2425 | 6  | D 9   | 1100.5735 | 550.7904 |
| 969.5364  | 485.2718 | 7  | Q 8   | 985.5465  | 493.2769 |
| 1082.6204 | 541.8139 | 8  | L 7   | 857.4880  | 429.2476 |
| 1219.6793 | 610.3433 | 9  | H 6   | 744.4039  | 372.7056 |
| 1332.7634 | 666.8853 | 10 | L 5   | 607.3450  | 304.1761 |
| 1461.8060 | 731.4066 | 11 | E 4   | 494.2609  | 247.6341 |
| 1608.8744 | 804.9408 | 12 | F 3   | 365.2183  | 183.1128 |
| 1679.9115 | 840.4594 | 13 | A 2   | 218.1499  | 109.5786 |
|           |          | 14 | K 1   | 147.1128  | 74.0600  |

[\[click\]](#) to move table

Static Modifications:

C: 57.02146

Variable Modifications:

E: 156.1011

PTYPE LMQHPFFTVHESK, MH+ 2344.1543, m/z 782.0563

File: platelet-12, Scan: 5398, Precursor m/z: 782.3925, Charge: 3

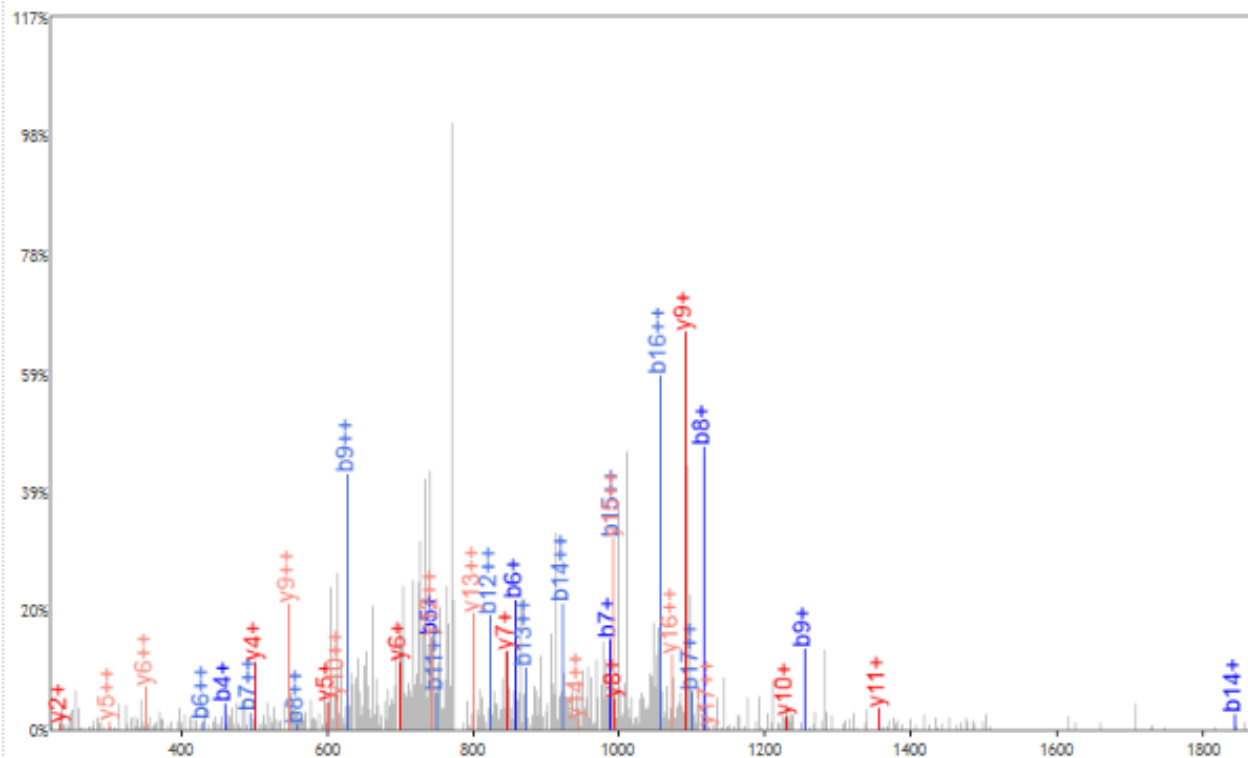

| b+        | b2+       | #  | Seq # | y+        | y2+       |
|-----------|-----------|----|-------|-----------|-----------|
| 98.0600   | 49.5337   | 1  | P 18  |           |           |
| 199.1077  | 100.0575  | 2  | T 17  | 2247.1015 | 1124.0544 |
| 362.1710  | 181.5892  | 3  | Y 16  | 2146.0538 | 1073.5306 |
| 459.2238  | 230.1155  | 4  | P 15  | 1982.9905 | 991.9989  |
| 744.3675  | 372.6874  | 5  | E 14  | 1885.9378 | 943.4725  |
| 857.4516  | 429.2294  | 6  | L 13  | 1600.7941 | 800.9007  |
| 988.4921  | 494.7497  | 7  | M 12  | 1487.7100 | 744.3586  |
| 1116.5506 | 558.7790  | 8  | Q 11  | 1356.6695 | 678.8384  |
| 1253.6095 | 627.3084  | 9  | H 10  | 1228.6109 | 614.8091  |
| 1350.6623 | 675.8348  | 10 | P 9   | 1091.5520 | 546.2796  |
| 1497.7307 | 749.3690  | 11 | F 8   | 994.4993  | 497.7533  |
| 1644.7991 | 822.9032  | 12 | F 7   | 847.4308  | 424.2191  |
| 1745.8468 | 873.4270  | 13 | T 6   | 700.3624  | 350.6849  |
| 1844.9152 | 922.9613  | 14 | V 5   | 599.3148  | 300.1610  |
| 1981.9741 | 991.4907  | 15 | H 4   | 500.2463  | 250.6268  |
| 2111.0167 | 1056.0120 | 16 | E 3   | 363.1874  | 182.0974  |
| 2198.0488 | 1099.5280 | 17 | S 2   | 234.1448  | 117.5761  |
|           |           | 18 | K 1   | 147.1128  | 74.0600   |

[\[Click\]](#) to move table

Static Modifications:

C: 57.02146

Variable Modifications:

E: 156.1011



QQLN**E**MLKDSTQWLEAKKEEAEQVIGQVR, MH+ 3456.7540, m/z 1152.9228

File: myofibril-7, Scan: 9196, Precursor m/z: 1153.2596, Charge: 3

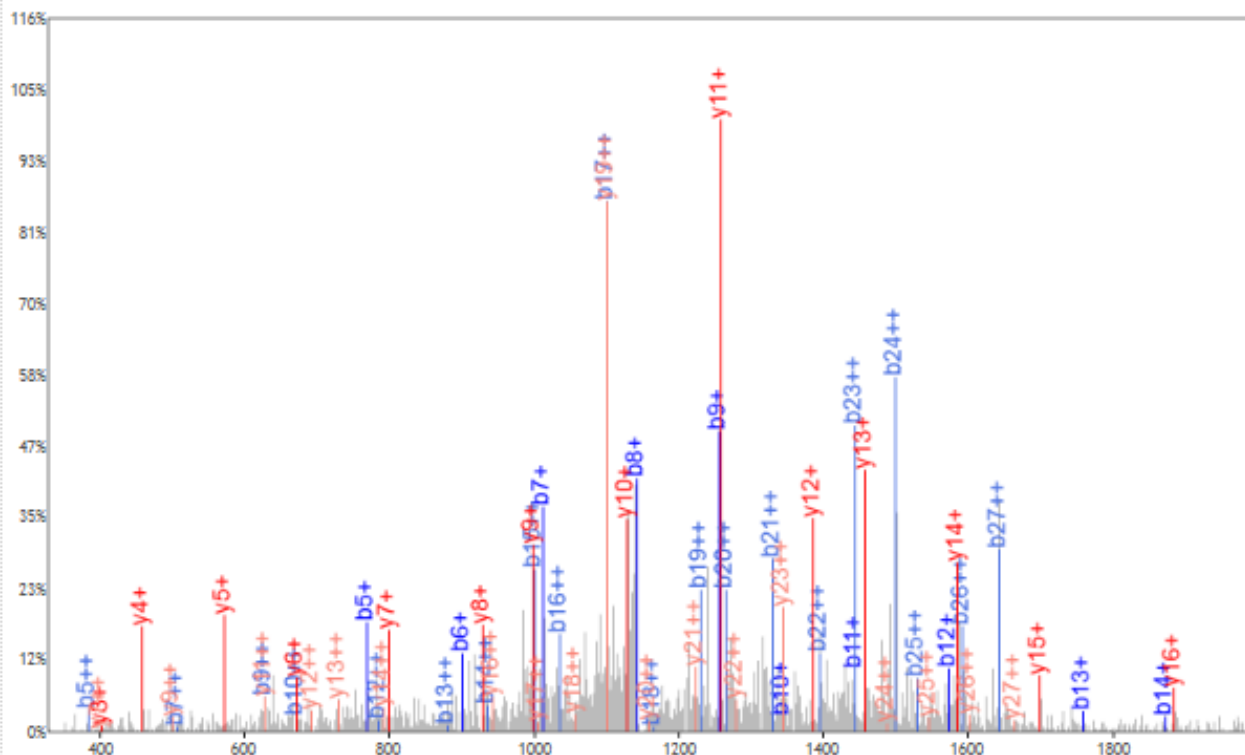

| b+        | b2+       | #  | Seq #    | y+ | y2+       |
|-----------|-----------|----|----------|----|-----------|
| 129.0659  | 65.0366   | 1  | Q        | 28 |           |
| 257.1244  | 129.0659  | 2  | Q        | 27 | 3328.6954 |
| 370.2085  | 185.6079  | 3  | L        | 26 | 3200.6368 |
| 484.2514  | 242.6293  | 4  | N        | 25 | 3087.5528 |
| 769.3951  | 385.2012  | 5  | <b>E</b> | 24 | 2973.5098 |
| 900.4356  | 450.7214  | 6  | M        | 23 | 2688.3661 |
| 1013.5197 | 507.2635  | 7  | L        | 22 | 2557.3257 |
| 1141.6146 | 571.3110  | 8  | K        | 21 | 2444.2416 |
| 1256.6416 | 628.8244  | 9  | D        | 20 | 2316.1466 |
| 1343.6736 | 672.3404  | 10 | S        | 19 | 2201.1197 |
| 1444.7213 | 722.8643  | 11 | T        | 18 | 2114.0877 |
| 1572.7799 | 786.8936  | 12 | Q        | 17 | 2013.0400 |
| 1758.8592 | 879.9332  | 13 | W        | 16 | 1884.9814 |
| 1871.9432 | 936.4753  | 14 | L        | 15 | 1698.9021 |
| 2000.9858 | 1000.9966 | 15 | E        | 14 | 1585.8180 |
| 2072.0229 | 1036.5151 | 16 | A        | 13 | 1456.7754 |
| 2200.1179 | 1100.5626 | 17 | K        | 12 | 1385.7383 |
| 2329.1605 | 1165.0839 | 18 | E        | 11 | 1257.6434 |
| 2458.2031 | 1229.6052 | 19 | E        | 10 | 1128.6008 |
| 2529.2402 | 1265.1237 | 20 | A        | 9  | 999.5582  |
| 2658.2828 | 1329.6450 | 21 | E        | 8  | 928.5211  |
| 2786.3414 | 1393.6743 | 22 | Q        | 7  | 799.4785  |
| 2885.4098 | 1443.2085 | 23 | V        | 6  | 671.4199  |
| 2998.4939 | 1499.7506 | 24 | I        | 5  | 572.3515  |
| 3055.5153 | 1528.2613 | 25 | G        | 4  | 459.2674  |
| 3183.5739 | 1592.2906 | 26 | Q        | 3  | 402.2459  |
| 3282.6423 | 1641.8248 | 27 | V        | 2  | 274.1874  |
|           |           | 28 | R        | 1  | 175.1190  |

QPGTSLV**D**ADTFHHQVR, MH+ 2064.0369, m/z 688.6838

File: platelet-11, Scan: 2217, Precursor m/z: 689.3545, Charge: 3

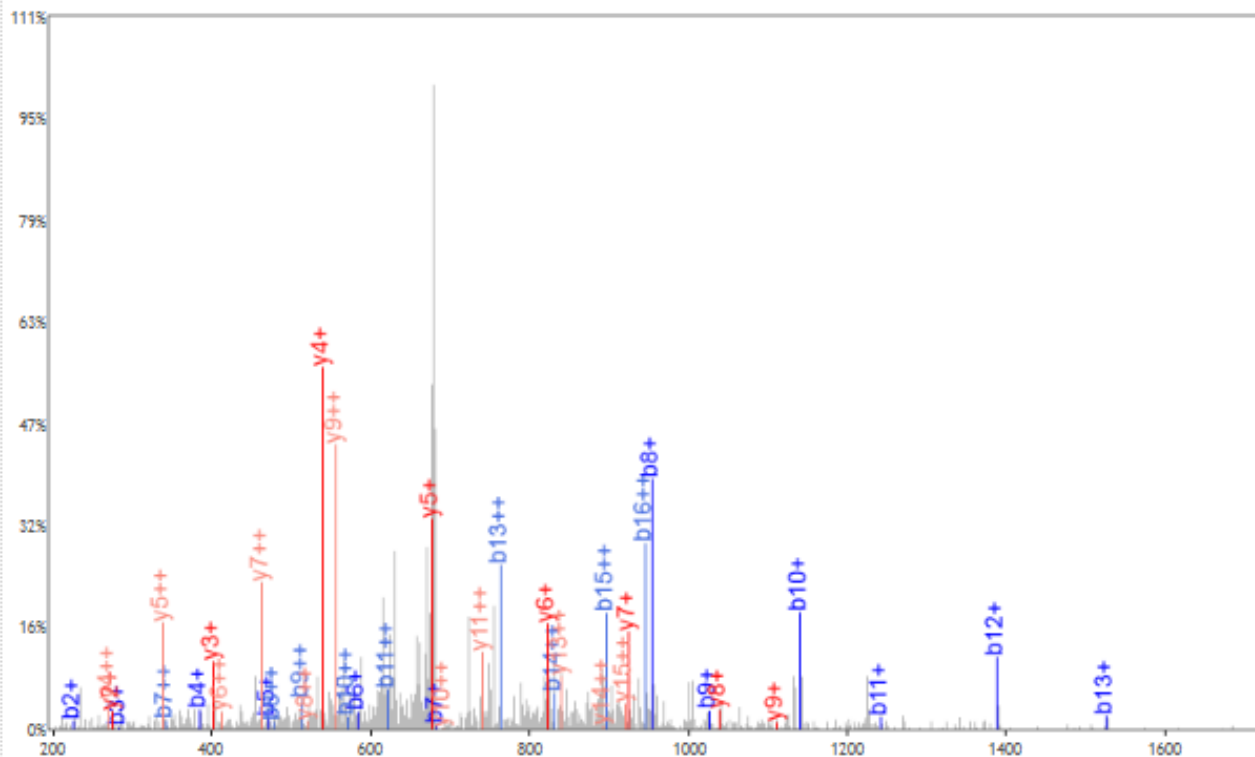

| b+        | b2+      | #  | Seq | #  | y+        | y2+      |
|-----------|----------|----|-----|----|-----------|----------|
| 129.0659  | 65.0366  | 1  | Q   | 17 |           |          |
| 226.1186  | 113.5629 | 2  | P   | 16 | 1935.9784 | 968.4928 |
| 283.1401  | 142.0737 | 3  | G   | 15 | 1838.9256 | 919.9664 |
| 384.1878  | 192.5975 | 4  | T   | 14 | 1781.9041 | 891.4557 |
| 471.2198  | 236.1135 | 5  | S   | 13 | 1680.8565 | 840.9319 |
| 584.3039  | 292.6556 | 6  | L   | 12 | 1593.8244 | 797.4159 |
| 683.3723  | 342.1898 | 7  | V   | 11 | 1480.7404 | 740.8738 |
| 954.5003  | 477.7538 | 8  | D   | 10 | 1381.6720 | 691.3396 |
| 1025.5374 | 513.2723 | 9  | A   | 9  | 1110.5439 | 555.7756 |
| 1140.5644 | 570.7858 | 10 | D   | 8  | 1039.5068 | 520.2570 |
| 1241.6120 | 621.3097 | 11 | T   | 7  | 924.4799  | 462.7436 |
| 1388.6805 | 694.8439 | 12 | F   | 6  | 823.4322  | 412.2197 |
| 1525.7394 | 763.3733 | 13 | H   | 5  | 676.3638  | 338.6855 |
| 1662.7983 | 831.9028 | 14 | H   | 4  | 539.3049  | 270.1561 |
| 1790.8569 | 895.9321 | 15 | Q   | 3  | 402.2459  | 201.6266 |
| 1889.9253 | 945.4663 | 16 | V   | 2  | 274.1874  | 137.5973 |
|           |          | 17 | R   | 1  | 175.1190  | 88.0631  |

[\[click\]](#) to move table

Static Modifications:

C: 57.02146

Variable Modifications:

D: 156.1011

ITYHPD GPEGQAYEVDFTPPFR, MH+ 2692.2790, m/z 898.0979

File: platelet-8, Scan: 5406, Precursor m/z: 898.1028, Charge: 3

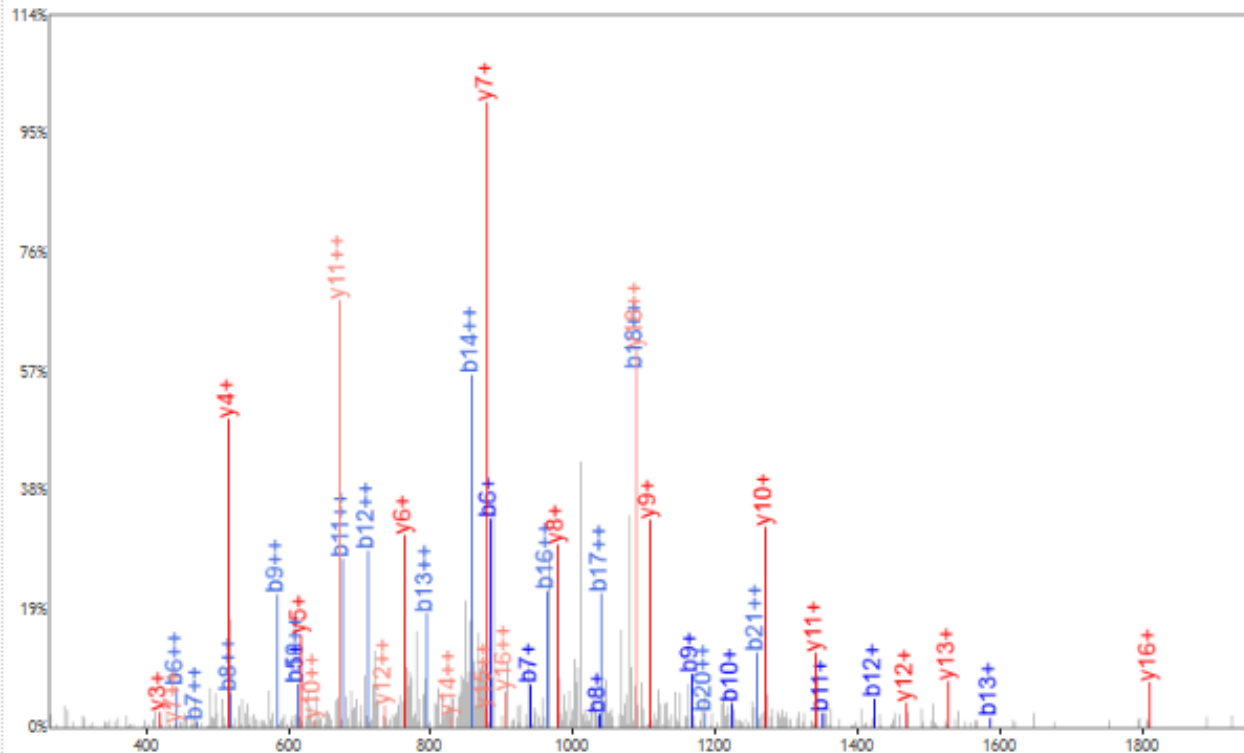

| b+        | b2+       | #  | Seq # | y+        | y2+       |
|-----------|-----------|----|-------|-----------|-----------|
| 114.0913  | 57.5493   | 1  | I 22  |           |           |
| 215.1390  | 108.0731  | 2  | T 21  | 2579.1950 | 1290.1011 |
| 378.2023  | 189.6048  | 3  | Y 20  | 2478.1473 | 1239.5773 |
| 515.2613  | 258.1343  | 4  | H 19  | 2315.0840 | 1158.0456 |
| 612.3140  | 306.6606  | 5  | P 18  | 2178.0250 | 1089.5162 |
| 883.4421  | 442.2247  | 6  | D 17  | 2080.9723 | 1040.9898 |
| 940.4635  | 470.7354  | 7  | G 16  | 1809.8442 | 905.4258  |
| 1037.5163 | 519.2618  | 8  | P 15  | 1752.8228 | 876.9150  |
| 1166.5589 | 583.7831  | 9  | E 14  | 1655.7700 | 828.3886  |
| 1223.5804 | 612.2938  | 10 | G 13  | 1526.7274 | 763.8673  |
| 1351.6389 | 676.3231  | 11 | Q 12  | 1469.7060 | 735.3566  |
| 1422.6760 | 711.8417  | 12 | A 11  | 1341.6474 | 671.3273  |
| 1585.7394 | 793.3733  | 13 | Y 10  | 1270.6103 | 635.8088  |
| 1714.7820 | 857.8946  | 14 | E 9   | 1107.5469 | 554.2771  |
| 1813.8504 | 907.4288  | 15 | V 8   | 978.5043  | 489.7558  |
| 1928.8773 | 964.9423  | 16 | D 7   | 879.4359  | 440.2216  |
| 2075.9457 | 1038.4765 | 17 | F 6   | 764.4090  | 382.7081  |
| 2176.9934 | 1089.0003 | 18 | T 5   | 617.3406  | 309.1739  |
| 2274.0462 | 1137.5267 | 19 | P 4   | 516.2929  | 258.6501  |
| 2371.0989 | 1186.0531 | 20 | P 3   | 419.2401  | 210.1237  |
| 2518.1674 | 1259.5873 | 21 | F 2   | 322.1874  | 161.5973  |
|           |           | 22 | R 1   | 175.1190  | 88.0631   |

[\[Click\]](#) to move table

Static Modifications:

C: 57.02146

Variable Modifications:

D: 156.1011

PRPT D A TVSLSSLVDPHQAR, MH+ 2466.2848, m/z 822.7664

File: platelet-14, Scan: 5267, Precursor m/z: 823.10284, Charge: 3

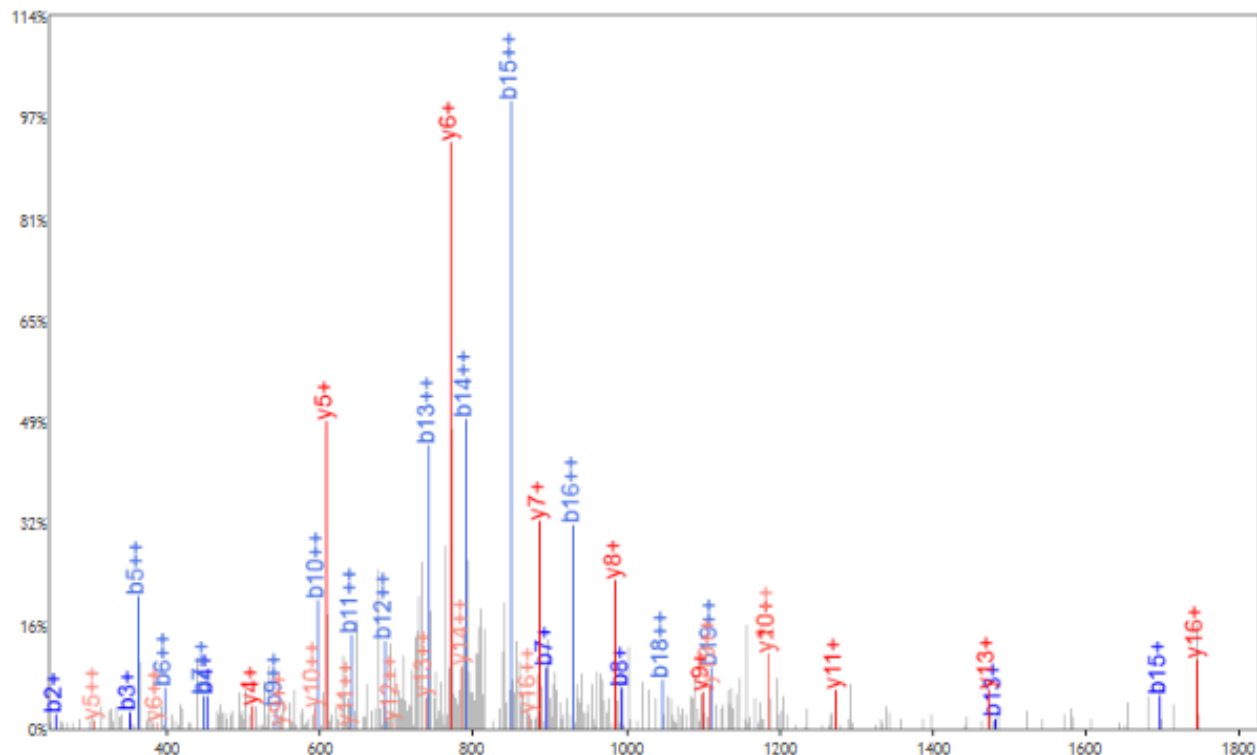

| b+        | b2+       | #  | Seq # | y+        | y2+       |
|-----------|-----------|----|-------|-----------|-----------|
| 98.0600   | 49.5337   | 1  | P 21  |           |           |
| 254.1612  | 127.5842  | 2  | R 20  | 2369.2320 | 1185.1196 |
| 351.2139  | 176.1106  | 3  | P 19  | 2213.1309 | 1107.0691 |
| 452.2616  | 226.6344  | 4  | T 18  | 2116.0781 | 1058.5427 |
| 723.3896  | 362.1985  | 5  | D 17  | 2015.0305 | 1008.0189 |
| 794.4268  | 397.7170  | 6  | A 16  | 1743.9024 | 872.4549  |
| 895.4744  | 448.2409  | 7  | T 15  | 1672.8653 | 836.9363  |
| 994.5428  | 497.7751  | 8  | V 14  | 1571.8176 | 786.4125  |
| 1081.5749 | 541.2911  | 9  | S 13  | 1472.7492 | 736.8782  |
| 1194.6589 | 597.8331  | 10 | L 12  | 1385.7172 | 693.3622  |
| 1281.6910 | 641.3491  | 11 | S 11  | 1272.6331 | 636.8202  |
| 1368.7230 | 684.8651  | 12 | S 10  | 1185.6011 | 593.3042  |
| 1481.8071 | 741.4072  | 13 | L 9   | 1098.5691 | 549.7882  |
| 1580.8755 | 790.9414  | 14 | V 8   | 985.4850  | 493.2461  |
| 1695.9024 | 848.4548  | 15 | D 7   | 886.4166  | 443.7119  |
| 1858.9657 | 929.9865  | 16 | Y 6   | 771.3896  | 386.1985  |
| 1956.0185 | 978.5129  | 17 | P 5   | 608.3263  | 304.6668  |
| 2093.0774 | 1047.0423 | 18 | H 4   | 511.2736  | 256.1404  |
| 2221.1360 | 1111.0716 | 19 | Q 3   | 374.2146  | 187.6110  |
| 2292.1731 | 1146.5902 | 20 | A 2   | 246.1561  | 123.5817  |
|           |           | 21 | R 1   | 175.1190  | 88.0631   |

[\[Click\]](#) to move table

Static Modifications:

C: 57.02146

Variable Modifications:

D: 156.1011

LLALSQ[E]HKFPTVPTKSELA VEILEK, MH+ 3076.7405, m/z 1026.2517

File: myofibril-14, Scan: 7192, Precursor m/z: 1026.9213, Charge: 3

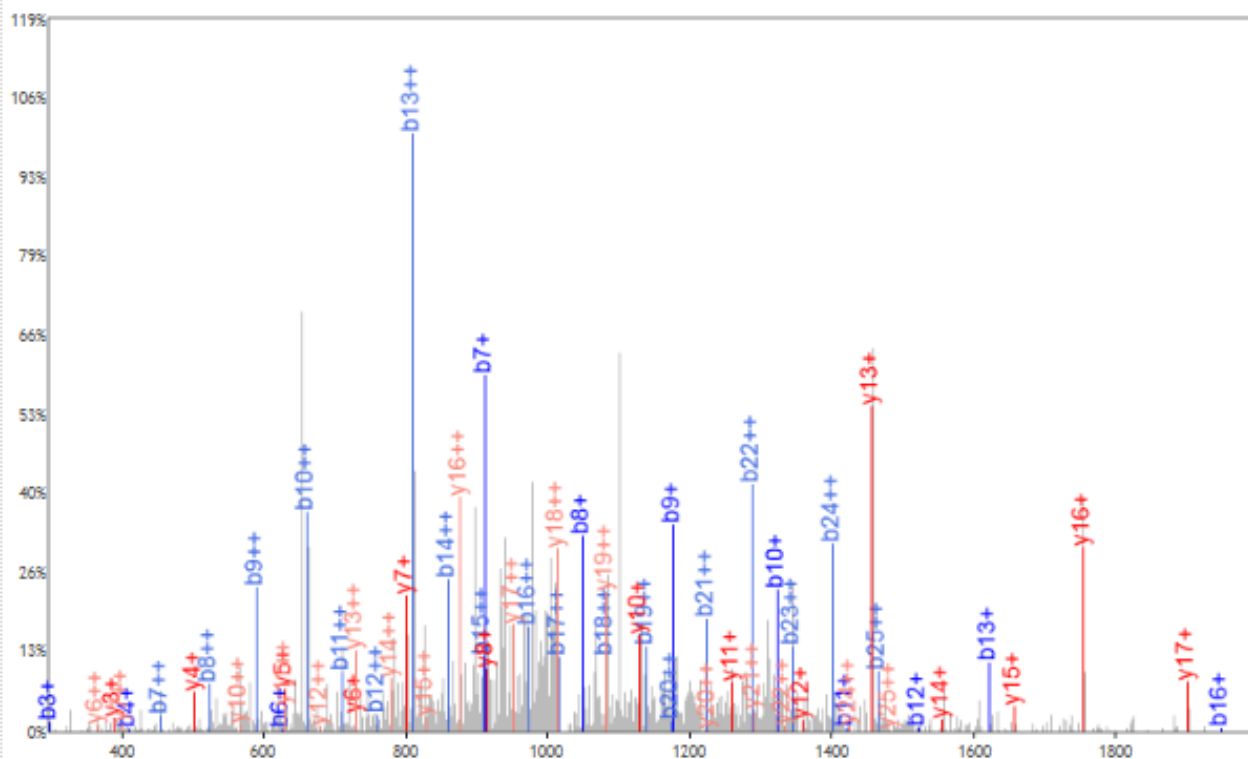

| b+        | b2+       | #  | Seq # | y+        | y2+       |
|-----------|-----------|----|-------|-----------|-----------|
| 114.0913  | 57.5493   | 1  | L 26  |           |           |
| 227.1754  | 114.0913  | 2  | L 25  | 2963.6564 | 1482.3318 |
| 298.2125  | 149.6099  | 3  | A 24  | 2850.5724 | 1425.7898 |
| 411.2966  | 206.1519  | 4  | L 23  | 2779.5352 | 1390.2713 |
| 498.3286  | 249.6679  | 5  | S 22  | 2666.4512 | 1333.7292 |
| 626.3872  | 313.6972  | 6  | Q 21  | 2579.4192 | 1290.2132 |
| 911.5309  | 456.2691  | 7  | E 20  | 2451.3606 | 1226.1839 |
| 1048.5898 | 524.7985  | 8  | H 19  | 2166.2169 | 1083.6121 |
| 1176.6848 | 588.8460  | 9  | K 18  | 2029.1580 | 1015.0826 |
| 1323.7532 | 662.3802  | 10 | F 17  | 1901.0630 | 951.0351  |
| 1420.8059 | 710.9066  | 11 | P 16  | 1753.9946 | 877.5009  |
| 1521.8536 | 761.4304  | 12 | T 15  | 1656.9418 | 828.9746  |
| 1620.9220 | 810.9647  | 13 | V 14  | 1555.8942 | 778.4507  |
| 1717.9748 | 859.4910  | 14 | P 13  | 1456.8257 | 728.9165  |
| 1819.0225 | 910.0149  | 15 | T 12  | 1359.7730 | 680.3901  |
| 1947.1174 | 974.0624  | 16 | K 11  | 1258.7253 | 629.8663  |
| 2034.1495 | 1017.5784 | 17 | S 10  | 1130.6303 | 565.8188  |
| 2163.1921 | 1082.0997 | 18 | E 9   | 1043.5983 | 522.3028  |
| 2276.2761 | 1138.6417 | 19 | L 8   | 914.5557  | 457.7815  |
| 2347.3132 | 1174.1603 | 20 | A 7   | 801.4716  | 401.2395  |
| 2446.3816 | 1223.6945 | 21 | V 6   | 730.4345  | 365.7209  |
| 2575.4242 | 1288.2158 | 22 | E 5   | 631.3661  | 316.1867  |
| 2688.5083 | 1344.7578 | 23 | I 4   | 502.3235  | 251.6654  |
| 2801.5924 | 1401.2998 | 24 | L 3   | 389.2395  | 195.1234  |
| 2930.6350 | 1465.8211 | 25 | E 2   | 276.1554  | 138.5813  |
|           |           | 26 | K 1   | 147.1128  | 74.0600   |

[\[Click\]](#) to move table

Static Modifications:

C: 57.02146

Variable Modifications:

E: 156.1011

MMDF **E**TFLPMLQHISK, MH+ 2124.0439, m/z 708.6861

File: myofibril-10, Scan: 10494, Precursor m/z: 709.3559, Charge: 3

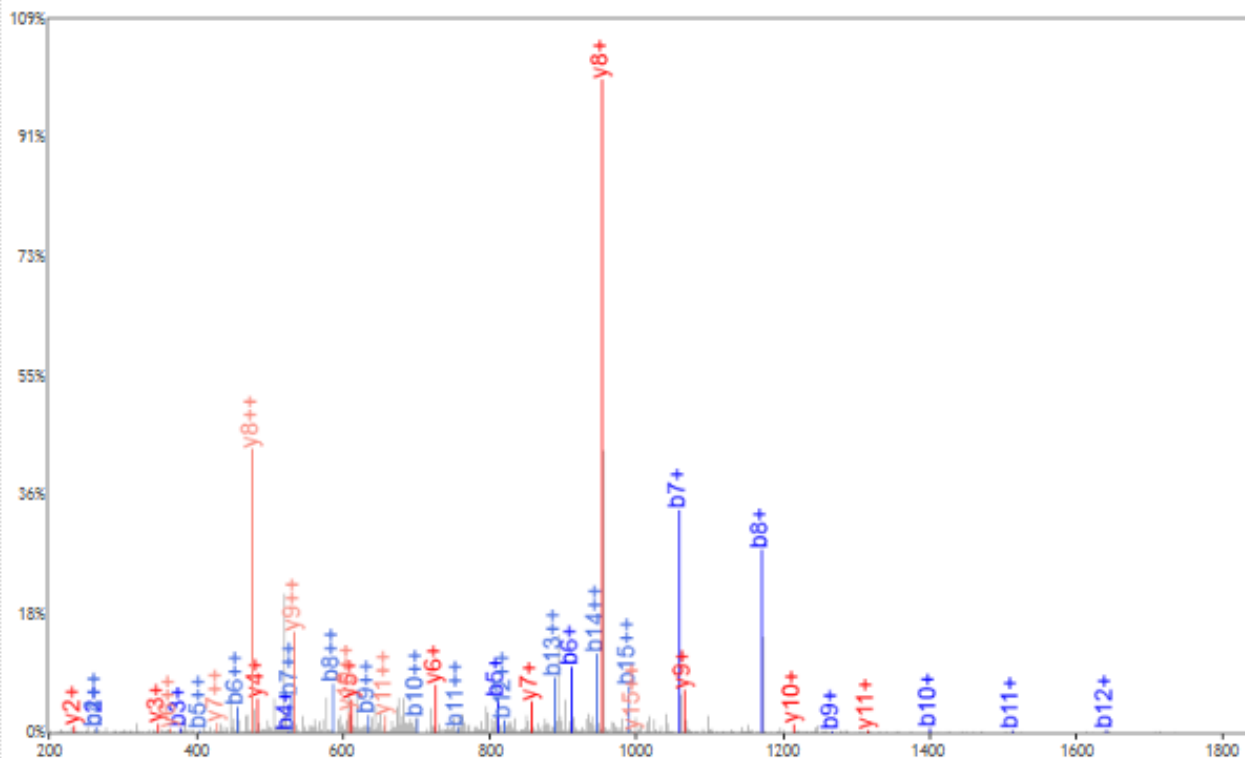

| b+        | b2+      | #  | Seq # | y+ | y2+                |
|-----------|----------|----|-------|----|--------------------|
| 132.0478  | 66.5275  | 1  | M     | 16 |                    |
| 263.0882  | 132.0478 | 2  | M     | 15 | 1993.0034 997.0053 |
| 378.1152  | 189.5612 | 3  | D     | 14 | 1861.9629 931.4851 |
| 525.1836  | 263.0954 | 4  | F     | 13 | 1746.9360 873.9716 |
| 810.3273  | 405.6673 | 5  | E     | 12 | 1599.8675 800.4374 |
| 911.3750  | 456.1911 | 6  | T     | 11 | 1314.7239 657.8656 |
| 1058.4434 | 529.7253 | 7  | F     | 10 | 1213.6762 607.3417 |
| 1171.5275 | 586.2674 | 8  | L     | 9  | 1066.6078 533.8075 |
| 1268.5802 | 634.7937 | 9  | P     | 8  | 953.5237 477.2655  |
| 1399.6207 | 700.3140 | 10 | M     | 7  | 856.4709 428.7391  |
| 1512.7048 | 756.8560 | 11 | L     | 6  | 725.4304 363.2189  |
| 1640.7633 | 820.8853 | 12 | Q     | 5  | 612.3464 306.6768  |
| 1777.8223 | 889.4148 | 13 | H     | 4  | 484.2878 242.6475  |
| 1890.9063 | 945.9568 | 14 | I     | 3  | 347.2289 174.1181  |
| 1977.9383 | 989.4728 | 15 | S     | 2  | 234.1448 117.5761  |
|           |          | 16 | K     | 1  | 147.1128 74.0600   |

[\[Click\]](#) to move table

Static Modifications:

C: 57.02146

Variable Modifications:

E: 156.1011

LKNA Y E SLEHLETFK, MH+ 2107.0818, m/z 703.0321

File: myofibril-9, Scan: 6230, Precursor m/z: 703.36774, Charge: 3

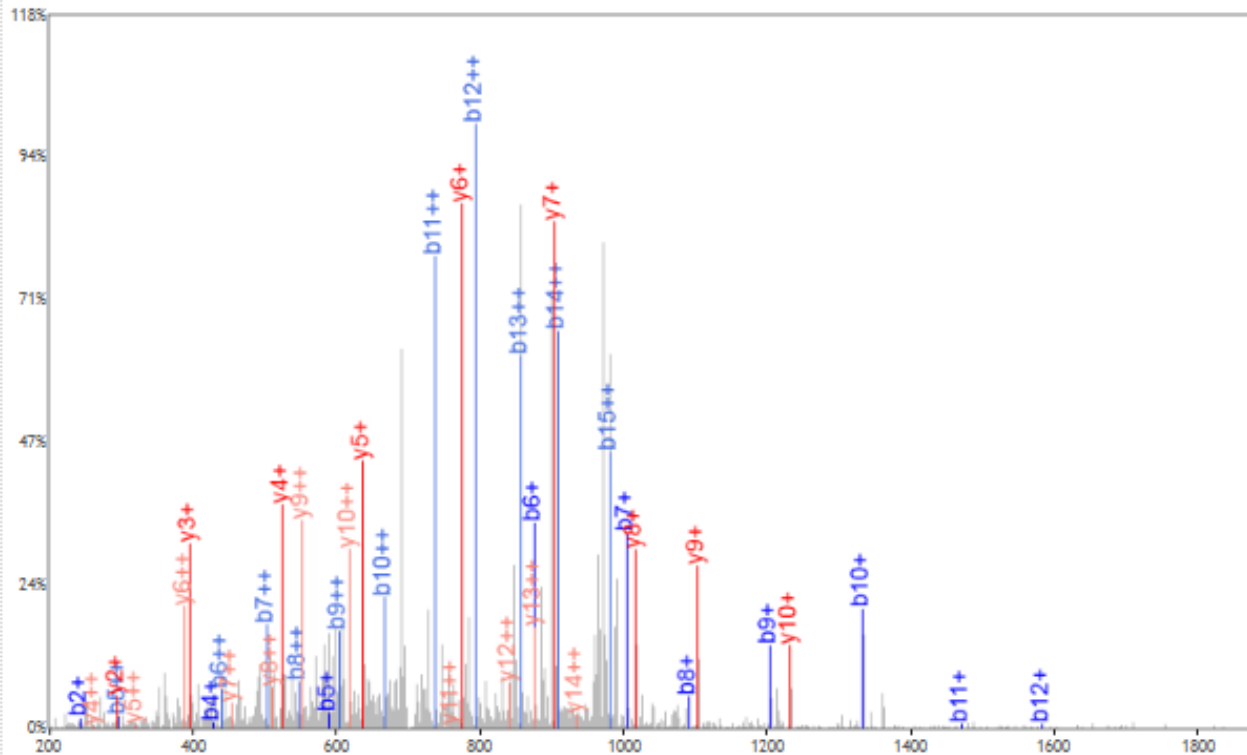

| b+        | b2+      | #  | Seq | #  | y+        | y2+      |
|-----------|----------|----|-----|----|-----------|----------|
| 114.0913  | 57.5493  | 1  | L   | 16 |           |          |
| 242.1863  | 121.5968 | 2  | K   | 15 | 1993.9978 | 997.5025 |
| 356.2292  | 178.6183 | 3  | N   | 14 | 1865.9028 | 933.4550 |
| 427.2663  | 214.1368 | 4  | A   | 13 | 1751.8599 | 876.4336 |
| 590.3297  | 295.6685 | 5  | Y   | 12 | 1680.8228 | 840.9150 |
| 875.4734  | 438.2403 | 6  | E   | 11 | 1517.7594 | 759.3834 |
| 1004.5160 | 502.7616 | 7  | E   | 10 | 1232.6157 | 616.8115 |
| 1091.5480 | 546.2776 | 8  | S   | 9  | 1103.5732 | 552.2902 |
| 1204.6321 | 602.8197 | 9  | L   | 8  | 1016.5411 | 508.7742 |
| 1333.6746 | 667.3410 | 10 | E   | 7  | 903.4571  | 452.2322 |
| 1470.7336 | 735.8704 | 11 | H   | 6  | 774.4145  | 387.7109 |
| 1583.8176 | 792.4124 | 12 | L   | 5  | 637.3556  | 319.1814 |
| 1712.8602 | 856.9337 | 13 | E   | 4  | 524.2715  | 262.6394 |
| 1813.9079 | 907.4576 | 14 | T   | 3  | 395.2289  | 198.1181 |
| 1960.9763 | 980.9918 | 15 | F   | 2  | 294.1812  | 147.5942 |
|           |          | 16 | K   | 1  | 147.1128  | 74.0600  |

[\[Click\]](#) to move table

Static Modifications:

C: 57.02146

Variable Modifications:

E: 156.1011

NSQAHLK**D**TQLQLDDAVHANDDLKENIAIVER, MH+ 3769.9216, m/z 1257.3120

File: myofibril-10, Scan: 5634, Precursor m/z: 1257.6482, Charge: 3

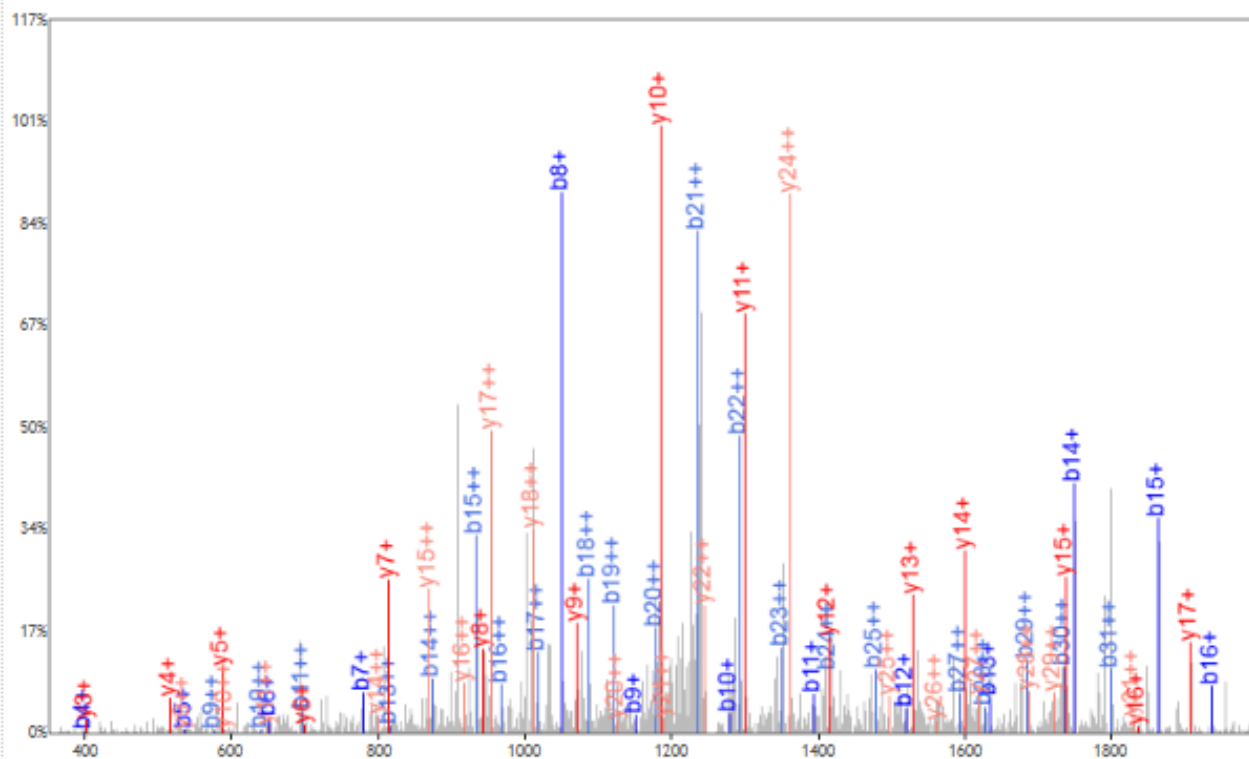

| b+        | b2+       | #  | Seq # | y+        | y2+       |
|-----------|-----------|----|-------|-----------|-----------|
| 115.0502  | 58.0287   | 1  | N 32  |           |           |
| 202.0822  | 101.5448  | 2  | S 31  | 3655.8787 | 1828.4430 |
| 330.1408  | 165.5740  | 3  | Q 30  | 3568.8466 | 1784.9270 |
| 401.1779  | 201.0926  | 4  | A 29  | 3440.7881 | 1720.8977 |
| 538.2368  | 269.6221  | 5  | H 28  | 3369.7509 | 1685.3791 |
| 651.3209  | 326.1641  | 6  | L 27  | 3232.6920 | 1616.8497 |
| 779.4159  | 390.2116  | 7  | K 26  | 3119.6080 | 1560.3076 |
| 1050.5439 | 525.7756  | 8  | D 25  | 2991.5130 | 1496.2601 |
| 1151.5916 | 576.2994  | 9  | T 24  | 2720.3850 | 1360.6961 |
| 1279.6502 | 640.3287  | 10 | Q 23  | 2619.3373 | 1310.1723 |
| 1392.7342 | 696.8708  | 11 | L 22  | 2491.2787 | 1246.1430 |
| 1520.7928 | 760.9000  | 12 | Q 21  | 2378.1946 | 1189.6010 |
| 1633.8769 | 817.4421  | 13 | L 20  | 2250.1361 | 1125.5717 |
| 1748.9038 | 874.9555  | 14 | D 19  | 2137.0520 | 1069.0296 |
| 1863.9308 | 932.4690  | 15 | D 18  | 2022.0251 | 1011.5162 |
| 1934.9679 | 967.9876  | 16 | A 17  | 1906.9981 | 954.0027  |
| 2034.0363 | 1017.5218 | 17 | V 16  | 1835.9610 | 918.4841  |
| 2171.0952 | 1086.0512 | 18 | H 15  | 1736.8926 | 868.9499  |
| 2242.1323 | 1121.5698 | 19 | A 14  | 1599.8337 | 800.4205  |
| 2356.1752 | 1178.5913 | 20 | N 13  | 1528.7966 | 764.9019  |
| 2471.2022 | 1236.1047 | 21 | D 12  | 1414.7536 | 707.8805  |
| 2586.2291 | 1293.6182 | 22 | D 11  | 1299.7267 | 650.3670  |
| 2699.3132 | 1350.1602 | 23 | L 10  | 1184.6997 | 592.8535  |
| 2827.4081 | 1414.2077 | 24 | K 9   | 1071.6157 | 536.3115  |
| 2956.4507 | 1478.7290 | 25 | E 8   | 943.5207  | 472.2640  |
| 3070.4937 | 1535.7505 | 26 | N 7   | 814.4781  | 407.7427  |
| 3183.5777 | 1592.2925 | 27 | I 6   | 700.4352  | 350.7212  |
| 3254.6148 | 1627.8111 | 28 | A 5   | 587.3511  | 294.1792  |
| 3367.6989 | 1684.3531 | 29 | I 4   | 516.3140  | 258.6606  |
| 3466.7673 | 1733.8873 | 30 | V 3   | 403.2300  | 202.1186  |
| 3595.8099 | 1798.4086 | 31 | E 2   | 304.1615  | 152.5844  |
|           |           | 32 | R 1   | 175.1190  | 88.0631   |



VKLEQQVDDLEGSLEQEKK, MH+ 2371.2463, m/z 791.0870

File: myofibril-trypsin-6, Scan: 5405, Precursor m/z: 791.42413, Charge: 3

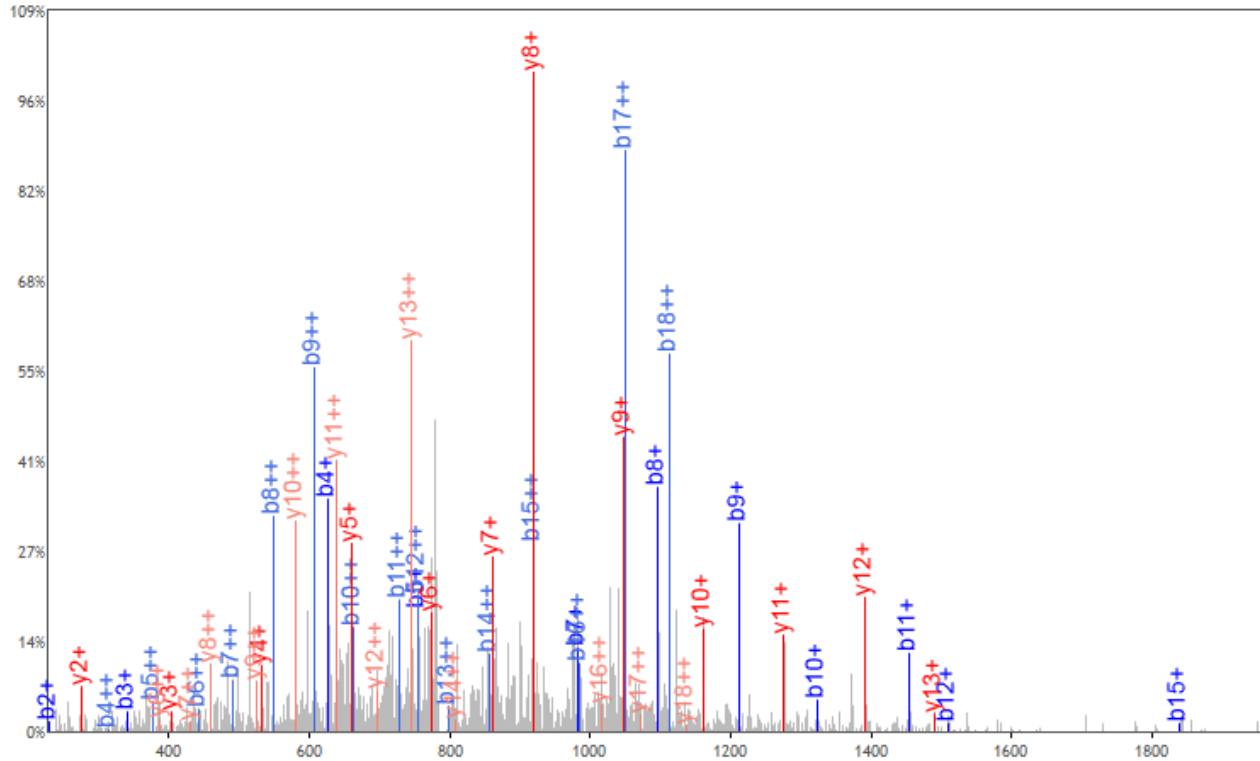

| b+        | b2+       | #  | Seq # | y+        | y2+       |
|-----------|-----------|----|-------|-----------|-----------|
| 100.0757  | 50.5415   | 1  | V 19  |           |           |
| 228.1707  | 114.5890  | 2  | K 18  | 2272.1779 | 1136.5926 |
| 341.2547  | 171.1310  | 3  | L 17  | 2144.0830 | 1072.5451 |
| 626.3984  | 313.7028  | 4  | E 16  | 2030.9989 | 1016.0031 |
| 754.4570  | 377.7321  | 5  | Q 15  | 1745.8552 | 873.4312  |
| 882.5156  | 441.7614  | 6  | Q 14  | 1617.7966 | 809.4019  |
| 981.5840  | 491.2956  | 7  | V 13  | 1489.7380 | 745.3727  |
| 1096.6109 | 548.8091  | 8  | D 12  | 1390.6696 | 695.8385  |
| 1211.6379 | 606.3226  | 9  | D 11  | 1275.6427 | 638.3250  |
| 1324.7219 | 662.8646  | 10 | L 10  | 1160.6157 | 580.8115  |
| 1453.7645 | 727.3859  | 11 | E 9   | 1047.5317 | 524.2695  |
| 1510.7860 | 755.8966  | 12 | G 8   | 918.4891  | 459.7482  |
| 1597.8180 | 799.4126  | 13 | S 7   | 861.4676  | 431.2374  |
| 1710.9021 | 855.9547  | 14 | L 6   | 774.4356  | 387.7214  |
| 1839.9447 | 920.4760  | 15 | E 5   | 661.3515  | 331.1794  |
| 1968.0032 | 984.5053  | 16 | Q 4   | 532.3089  | 266.6581  |
| 2097.0458 | 1049.0266 | 17 | E 3   | 404.2504  | 202.6288  |
| 2225.1408 | 1113.0740 | 18 | K 2   | 275.2078  | 138.1075  |
|           |           | 19 | K 1   | 147.1128  | 74.0600   |

[\[Click\]](#) to move table

Static Modifications:

C: 57.02146

Variable Modifications:

E: 156.1011

LA **E**KDEEMEQAK, MH+ 1576.7635, m/z 788.8854

File: myofibril-trypsin-4, Scan: 3028, Precursor m/z: 789.8891, Charge: 2

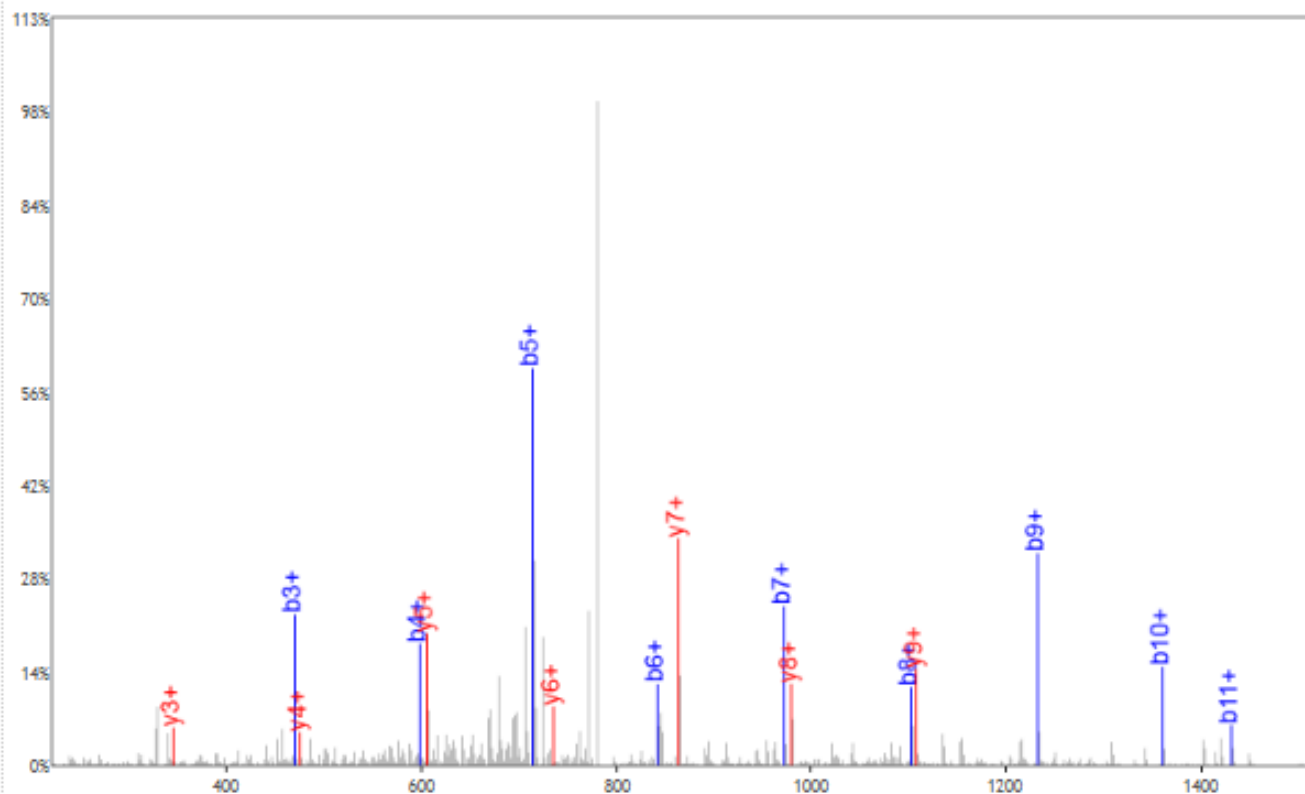

| b+        | #  | Seq # | y+        |
|-----------|----|-------|-----------|
| 114.0913  | 1  | L 12  |           |
| 185.1285  | 2  | A 11  | 1463.6795 |
| 470.2721  | 3  | E 10  | 1392.6424 |
| 598.3671  | 4  | K 9   | 1107.4987 |
| 713.3941  | 5  | D 8   | 979.4037  |
| 842.4366  | 6  | E 7   | 864.3768  |
| 971.4792  | 7  | E 6   | 735.3342  |
| 1102.5197 | 8  | M 5   | 606.2916  |
| 1231.5623 | 9  | E 4   | 475.2511  |
| 1359.6209 | 10 | Q 3   | 346.2085  |
| 1430.6580 | 11 | A 2   | 218.1499  |
|           | 12 | K 1   | 147.1128  |

[\[Click\]](#) to move table

Static Modifications:

C: 57.02146

Variable Modifications:

E: 156.1011

VLHMDQNPYYGGESAITPLEDLYK, MH+ 2996.4458, m/z 999.4868

File: platelet-6, Scan: 6825, Precursor m/z: 999.8227, Charge: 3

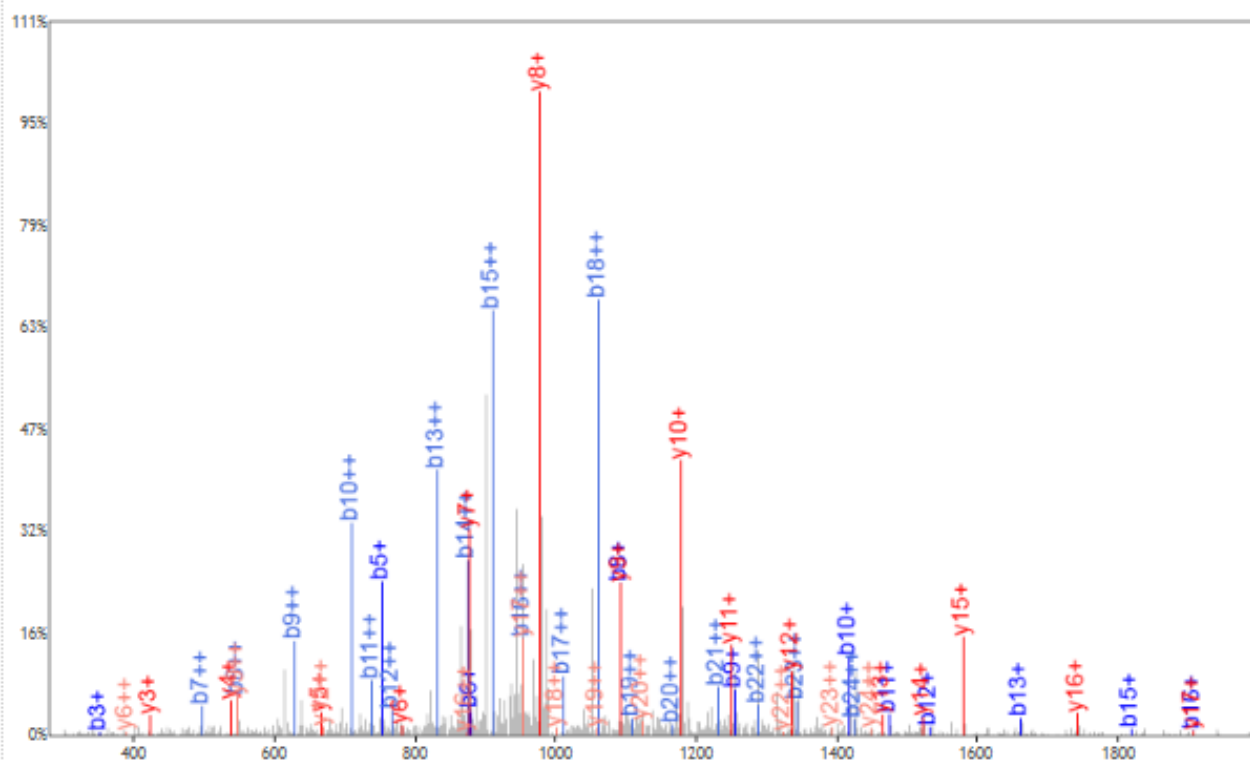

| b+        | b2+       | #  | Seq | #  | y+        | y2+       |
|-----------|-----------|----|-----|----|-----------|-----------|
| 100.0757  | 50.5415   | 1  | V   | 25 |           |           |
| 213.1598  | 107.0835  | 2  | L   | 24 | 2897.3774 | 1449.1923 |
| 350.2187  | 175.6130  | 3  | H   | 23 | 2784.2934 | 1392.6503 |
| 481.2592  | 241.1332  | 4  | M   | 22 | 2647.2344 | 1324.1209 |
| 752.3872  | 376.6972  | 5  | D   | 21 | 2516.1940 | 1258.6006 |
| 880.4458  | 440.7265  | 6  | Q   | 20 | 2245.0659 | 1123.0366 |
| 994.4887  | 497.7480  | 7  | N   | 19 | 2117.0073 | 1059.0073 |
| 1091.5415 | 546.2744  | 8  | P   | 18 | 2002.9644 | 1001.9858 |
| 1254.6048 | 627.8060  | 9  | Y   | 17 | 1905.9117 | 953.4595  |
| 1417.6681 | 709.3377  | 10 | Y   | 16 | 1742.8483 | 871.9278  |
| 1474.6896 | 737.8484  | 11 | G   | 15 | 1579.7850 | 790.3961  |
| 1531.7110 | 766.3592  | 12 | G   | 14 | 1522.7635 | 761.8854  |
| 1660.7536 | 830.8805  | 13 | E   | 13 | 1465.7421 | 733.3747  |
| 1747.7857 | 874.3965  | 14 | S   | 12 | 1336.6995 | 668.8534  |
| 1818.8228 | 909.9150  | 15 | A   | 11 | 1249.6674 | 625.3374  |
| 1905.8548 | 953.4310  | 16 | S   | 10 | 1178.6303 | 589.8188  |
| 2018.9389 | 1009.9731 | 17 | I   | 9  | 1091.5983 | 546.3028  |
| 2119.9866 | 1060.4969 | 18 | T   | 8  | 978.5142  | 489.7608  |
| 2217.0393 | 1109.0233 | 19 | P   | 7  | 877.4666  | 439.2369  |
| 2330.1234 | 1165.5653 | 20 | L   | 6  | 780.4138  | 390.7105  |
| 2459.1660 | 1230.0866 | 21 | E   | 5  | 667.3297  | 334.1685  |
| 2574.1929 | 1287.6001 | 22 | D   | 4  | 538.2871  | 269.6472  |
| 2687.2770 | 1344.1421 | 23 | L   | 3  | 423.2602  | 212.1337  |
| 2850.3403 | 1425.6738 | 24 | Y   | 2  | 310.1761  | 155.5917  |
|           |           | 25 | K   | 1  | 147.1128  | 74.0600   |

[\[click\]](#) to move table

Static Modifications:

C: 57.02146

Variable Modifications:

D: 156.1011

PPVL **E**EWTSVAKPK, MH+ 1736.9694, m/z 579.6613

File: platelet-10, Scan: 4534, Precursor m/z: 579.99713, Charge: 3

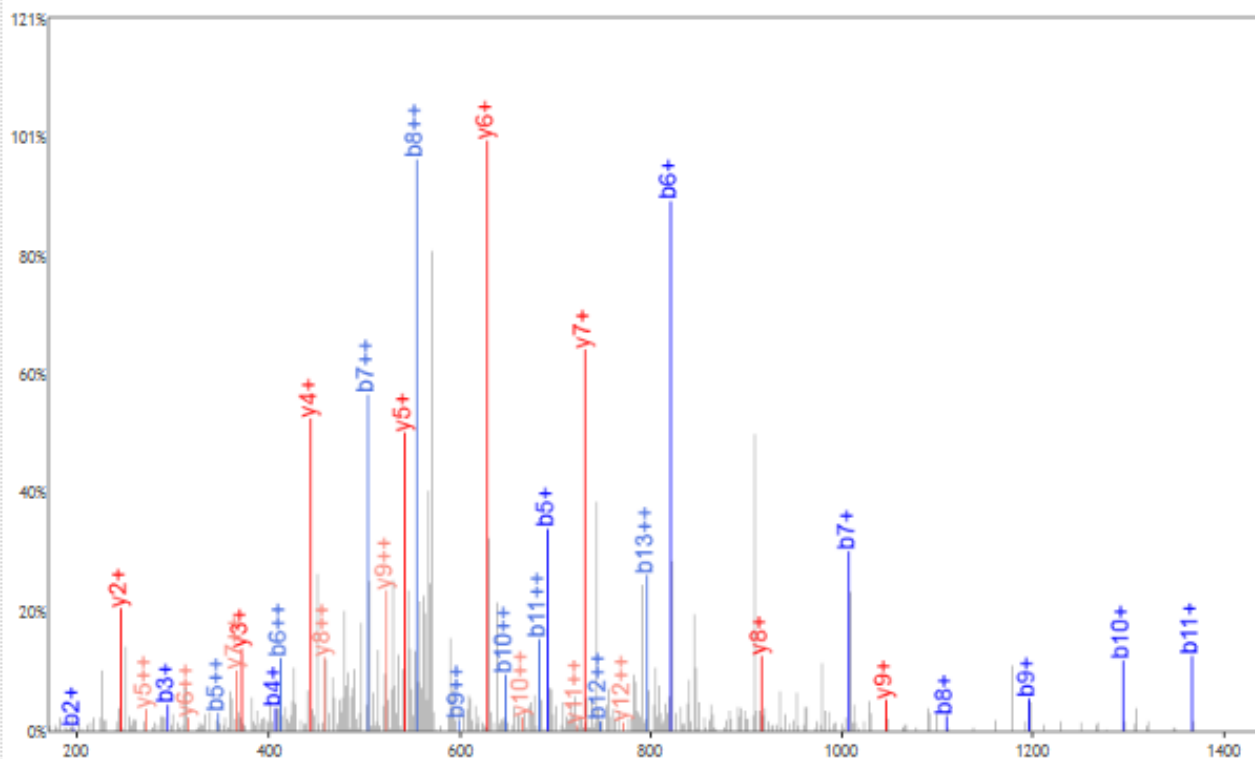

| b+        | b2+      | #  | Seq #       | y+        | y2+      |
|-----------|----------|----|-------------|-----------|----------|
| 98.0600   | 49.5337  | 1  | P 14        |           |          |
| 195.1128  | 98.0600  | 2  | P 13        | 1639.9166 | 820.4619 |
| 294.1812  | 147.5942 | 3  | V 12        | 1542.8638 | 771.9356 |
| 407.2653  | 204.1363 | 4  | L 11        | 1443.7954 | 722.4014 |
| 692.4090  | 346.7084 | 5  | <b>E</b> 10 | 1330.7114 | 665.8593 |
| 821.4516  | 411.2294 | 6  | E 9         | 1045.5677 | 523.2875 |
| 1007.5309 | 504.2694 | 7  | W 8         | 916.5251  | 458.7662 |
| 1108.5786 | 554.7929 | 8  | T 7         | 730.4458  | 365.7265 |
| 1195.6106 | 598.3089 | 9  | S 6         | 629.3981  | 315.2027 |
| 1294.6790 | 647.8434 | 10 | V 5         | 542.3661  | 271.6867 |
| 1365.7164 | 683.3617 | 11 | A 4         | 443.2976  | 222.1525 |
| 1493.8111 | 747.4092 | 12 | K 3         | 372.2605  | 186.6339 |
| 1590.8638 | 795.9356 | 13 | P 2         | 244.1656  | 122.5864 |
|           |          | 14 | K 1         | 147.1128  | 74.0600  |

[\[click\]](#) to move table

Static Modifications:

C: 57.02146

Variable Modifications:

E: 156.1011

LTWEPP EFDGGSPILHYVLER, MH+ 2611.3303, m/z 871.1150

File: myofibril-9, Scan: 10119, Precursor m/z: 871.4515, Charge: 3

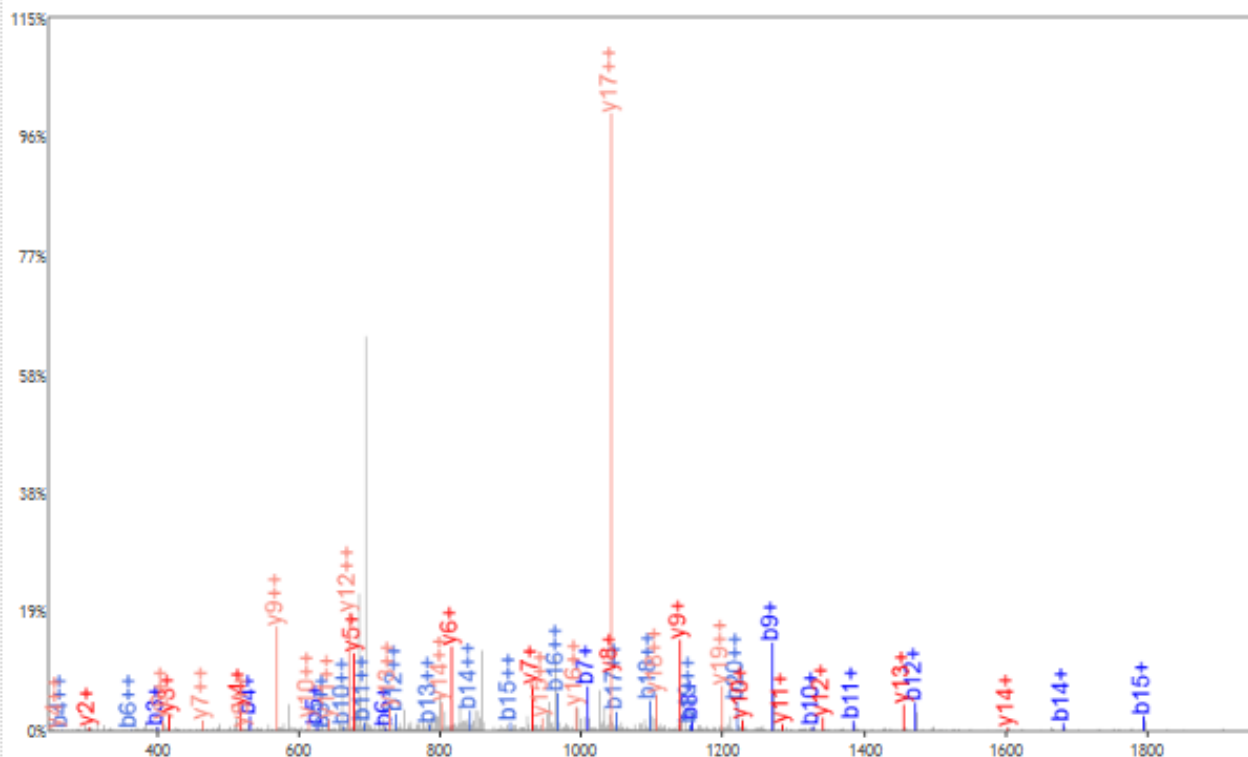

| b+        | b2+       | #  | Seq # | y+        | y2+       |
|-----------|-----------|----|-------|-----------|-----------|
| 114.0913  | 57.5493   | 1  | L 21  |           |           |
| 215.1390  | 108.0731  | 2  | T 20  | 2498.2463 | 1249.6268 |
| 401.2183  | 201.1128  | 3  | W 19  | 2397.1986 | 1199.1029 |
| 530.2609  | 265.6341  | 4  | E 18  | 2211.1193 | 1106.0633 |
| 627.3137  | 314.1605  | 5  | P 17  | 2082.0767 | 1041.5420 |
| 724.3665  | 362.6869  | 6  | P 16  | 1985.0239 | 993.0156  |
| 1009.5101 | 505.2587  | 7  | E 15  | 1887.9712 | 944.4392  |
| 1156.5786 | 578.7929  | 8  | F 14  | 1602.8275 | 801.9174  |
| 1271.6055 | 636.3064  | 9  | D 13  | 1455.7591 | 728.3832  |
| 1328.6270 | 664.8171  | 10 | G 12  | 1340.7321 | 670.8697  |
| 1385.6484 | 693.3279  | 11 | G 11  | 1283.7106 | 642.3590  |
| 1472.6805 | 736.8439  | 12 | S 10  | 1226.6892 | 613.8482  |
| 1569.7332 | 785.3702  | 13 | P 9   | 1139.6572 | 570.3322  |
| 1682.8173 | 841.9123  | 14 | I 8   | 1042.6044 | 521.8058  |
| 1795.9014 | 898.4543  | 15 | L 7   | 929.5203  | 465.2638  |
| 1932.9603 | 966.9838  | 16 | H 6   | 816.4363  | 408.7218  |
| 2096.0236 | 1048.5154 | 17 | Y 5   | 679.3774  | 340.1923  |
| 2195.0920 | 1098.0496 | 18 | V 4   | 516.3140  | 258.6606  |
| 2308.1761 | 1154.5917 | 19 | L 3   | 417.2456  | 209.1264  |
| 2437.2187 | 1219.1130 | 20 | E 2   | 304.1615  | 152.5844  |
|           |           | 21 | R 1   | 175.1190  | 88.0631   |

[\[Click\]](#) to move table

Static Modifications:

C: 57.02146

Variable Modifications:

E: 156.1011

FVESRDVWMTDTSITEEQAGPGEPAAPFFISKPVVQK, MH+ 4163.1118, m/z 1041.5334

File: mycfibril-9, Scan: 7049, Precursor m/z: 1041.7876, Charge: 4

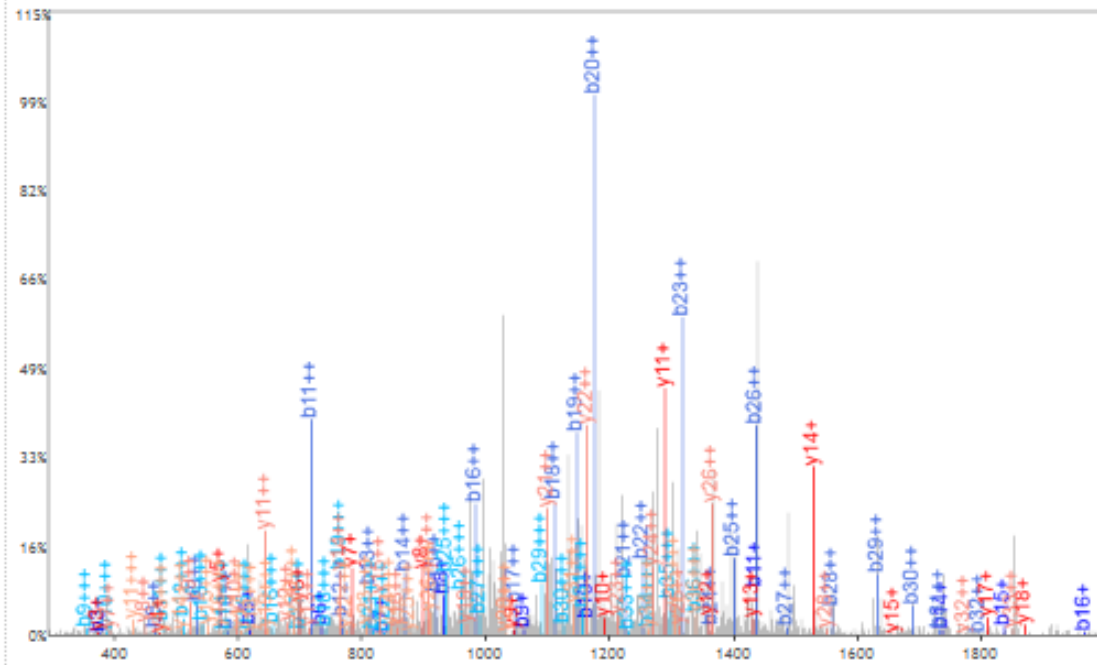

| b+        | b2+       | b3+       | #  | Seq # | y+ | y2+       | y3+       |
|-----------|-----------|-----------|----|-------|----|-----------|-----------|
| 148.0757  | 74.5415   | 50.0301   | 1  | F     | 37 |           |           |
| 247.1441  | 124.0757  | 83.0529   | 2  | V     | 36 | 4016.0433 | 2008.5253 |
| 376.1867  | 188.5970  | 126.0671  | 3  | E     | 35 | 3916.9749 | 1958.9911 |
| 463.2187  | 232.1130  | 155.0778  | 4  | S     | 34 | 3787.9323 | 1894.4698 |
| 619.3198  | 310.1636  | 207.1115  | 5  | R     | 33 | 3700.9003 | 1850.9538 |
| 734.3468  | 367.6770  | 245.4538  | 6  | D     | 32 | 3544.7992 | 1772.9032 |
| 833.4152  | 417.2112  | 278.4766  | 7  | V     | 31 | 3429.7723 | 1715.3898 |
| 932.4836  | 466.7454  | 311.4994  | 8  | V     | 30 | 3330.7038 | 1665.8556 |
| 1063.5241 | 532.2657  | 355.1795  | 9  | M     | 29 | 3231.6354 | 1616.3214 |
| 1164.5718 | 582.7895  | 388.8621  | 10 | T     | 28 | 3100.5949 | 1550.8011 |
| 1435.6998 | 718.3535  | 479.2381  | 11 | D     | 27 | 2999.5473 | 1500.2773 |
| 1536.7475 | 768.8774  | 512.9207  | 12 | T     | 26 | 2728.4192 | 1364.7132 |
| 1623.7795 | 812.3934  | 541.9314  | 13 | S     | 25 | 2627.3715 | 1314.1894 |
| 1736.8636 | 868.9354  | 579.6260  | 14 | I     | 24 | 2540.3395 | 1270.6734 |
| 1837.9113 | 919.4593  | 613.3086  | 15 | T     | 23 | 2427.2555 | 1214.1314 |
| 1966.9539 | 983.9806  | 656.3228  | 16 | E     | 22 | 2326.2078 | 1163.6075 |
| 2095.9964 | 1048.5019 | 699.3370  | 17 | E     | 21 | 2197.1652 | 1099.0862 |
| 2224.0550 | 1112.5312 | 742.0232  | 18 | Q     | 20 | 2068.1226 | 1034.5649 |
| 2295.0921 | 1148.0497 | 765.7022  | 19 | A     | 19 | 1940.0640 | 970.5356  |
| 2352.1136 | 1176.5604 | 784.7094  | 20 | G     | 18 | 1869.0269 | 935.0171  |
| 2449.1664 | 1225.0868 | 817.0603  | 21 | P     | 17 | 1812.0054 | 906.5064  |
| 2506.1878 | 1253.5976 | 836.0675  | 22 | G     | 16 | 1714.9527 | 857.9800  |
| 2635.2304 | 1318.1189 | 879.0817  | 23 | E     | 15 | 1657.9312 | 829.4692  |
| 2732.2832 | 1366.6452 | 911.4326  | 24 | P     | 14 | 1528.8886 | 764.9479  |
| 2803.3203 | 1402.1638 | 935.1116  | 25 | A     | 13 | 1431.8358 | 716.4216  |
| 2874.3574 | 1437.6823 | 958.7907  | 26 | A     | 12 | 1360.7987 | 680.9030  |
| 2971.4102 | 1486.2087 | 991.1416  | 27 | P     | 11 | 1289.7616 | 645.3844  |
| 3118.4786 | 1559.7429 | 1040.1644 | 28 | F     | 10 | 1192.7089 | 596.8581  |
| 3265.5470 | 1633.2771 | 1089.1872 | 29 | F     | 9  | 1045.6404 | 523.3239  |
| 3378.6311 | 1689.8192 | 1126.8819 | 30 | I     | 8  | 898.5720  | 449.7897  |
| 3465.6631 | 1733.3352 | 1155.8926 | 31 | S     | 7  | 785.4880  | 393.2476  |
| 3593.7581 | 1797.3827 | 1198.5909 | 32 | K     | 6  | 698.4559  | 349.7316  |
| 3690.8108 | 1845.9091 | 1230.9418 | 33 | P     | 5  | 570.3610  | 285.6841  |
| 3789.8792 | 1895.4433 | 1263.9646 | 34 | V     | 4  | 473.3082  | 237.1577  |
| 3888.9477 | 1944.9775 | 1296.9874 | 35 | V     | 3  | 374.2398  | 187.6235  |
| 4017.0062 | 2009.0068 | 1339.6736 | 36 | Q     | 2  | 275.1714  | 138.0893  |
|           |           |           | 37 | K     | 1  | 147.1128  | 74.0600   |

KGWQTV**D**TTVKDTK, MH+ 1762.9446, m/z 881.9759

File: myofibril-trypsin-10, Scan: 2971, Precursor m/z: 882.4793, Charge: 2

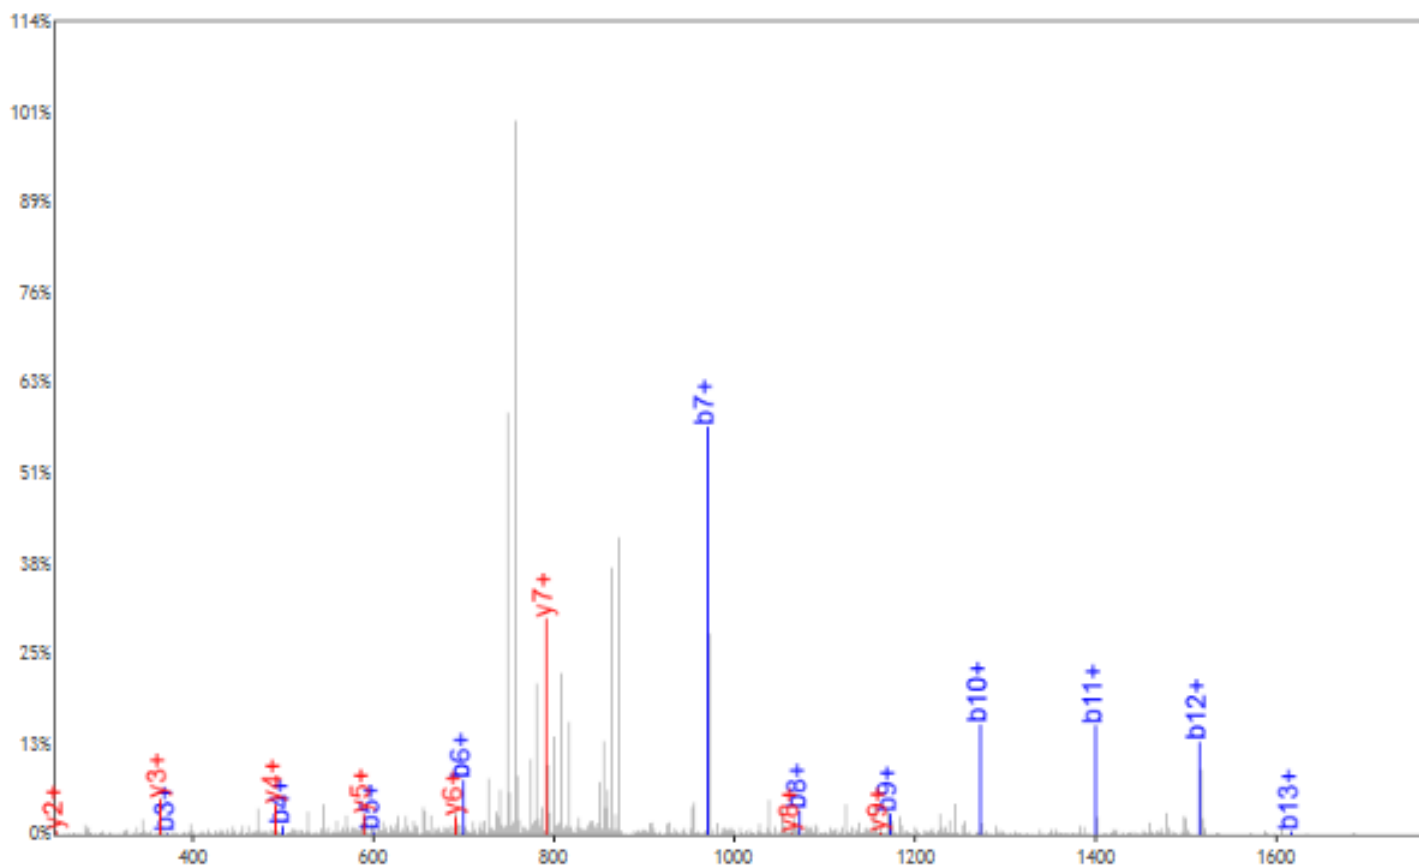

| b+        | #  | Seq # | y+ |
|-----------|----|-------|----|
| 129.1022  | 1  | K     | 14 |
| 186.1237  | 2  | G     | 13 |
| 372.2030  | 3  | W     | 12 |
| 500.2616  | 4  | Q     | 11 |
| 601.3093  | 5  | T     | 10 |
| 700.3777  | 6  | V     | 9  |
| 971.5057  | 7  | D     | 8  |
| 1072.5534 | 8  | T     | 7  |
| 1173.6011 | 9  | T     | 6  |
| 1272.6695 | 10 | V     | 5  |
| 1400.7645 | 11 | K     | 4  |
| 1515.7914 | 12 | D     | 3  |
| 1616.8391 | 13 | T     | 2  |
|           | 14 | K     | 1  |

[\[Click\]](#) to move table

Static Modifications:

C: 57.02146

Variable Modifications:

D: 156.1011

QLFHP EQLITGKEDAANNYAR, MH+ 2571.3062, m/z 857.7736

File: platelet-11, Scan: 3417, Precursor m/z: 858.111, Charge: 3

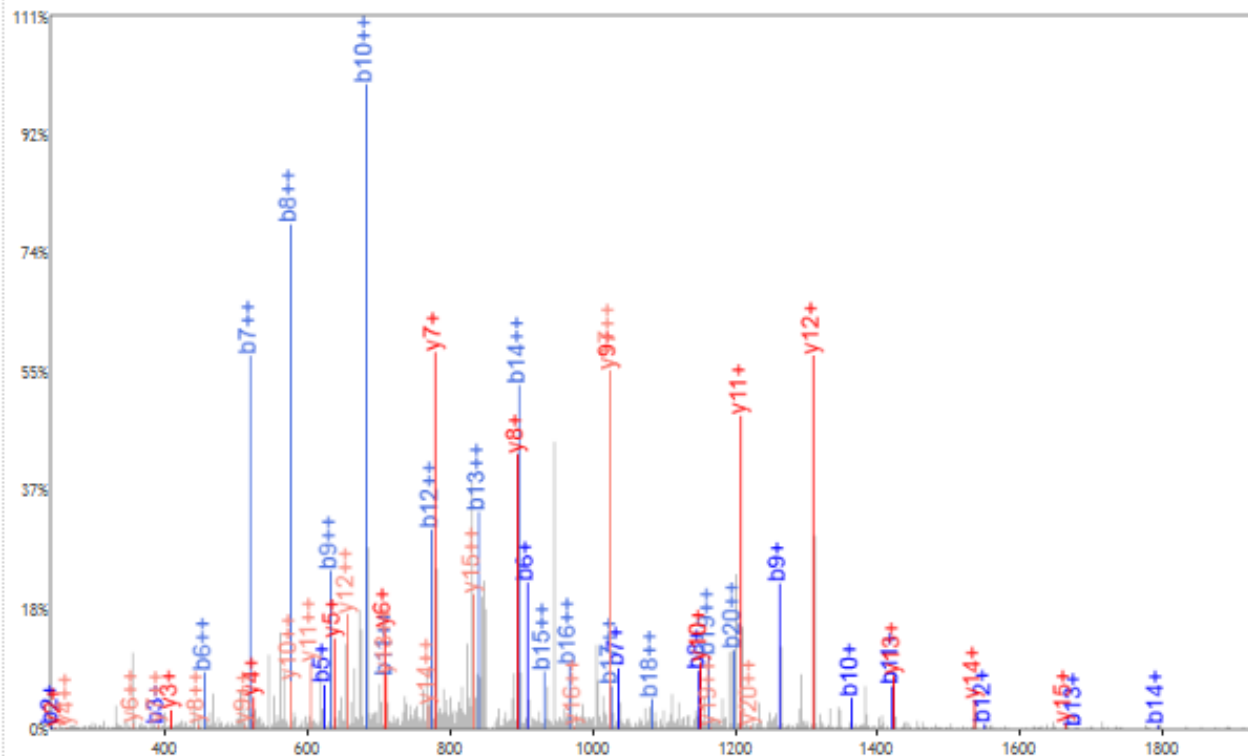

| b+        | b2+       | #  | Seq # | y+        | y2+       |
|-----------|-----------|----|-------|-----------|-----------|
| 129.0659  | 65.0366   | 1  | Q 21  |           |           |
| 242.1499  | 121.5786  | 2  | L 20  | 2443.2477 | 1222.1275 |
| 389.2183  | 195.1128  | 3  | F 19  | 2330.1636 | 1165.5854 |
| 526.2772  | 263.6423  | 4  | H 18  | 2183.0952 | 1092.0512 |
| 623.3300  | 312.1686  | 5  | P 17  | 2046.0363 | 1023.5218 |
| 908.4737  | 454.7405  | 6  | E 16  | 1948.9835 | 974.9954  |
| 1036.5323 | 518.7698  | 7  | Q 15  | 1663.8398 | 832.4235  |
| 1149.6163 | 575.3118  | 8  | L 14  | 1535.7812 | 768.3943  |
| 1262.7004 | 631.8538  | 9  | I 13  | 1422.6972 | 711.8522  |
| 1363.7481 | 682.3777  | 10 | T 12  | 1309.6131 | 655.3102  |
| 1420.7695 | 710.8884  | 11 | G 11  | 1208.5654 | 604.7864  |
| 1548.8645 | 774.9359  | 12 | K 10  | 1151.5440 | 576.2756  |
| 1677.9071 | 839.4572  | 13 | E 9   | 1023.4490 | 512.2281  |
| 1792.9340 | 896.9707  | 14 | D 8   | 894.4064  | 447.7068  |
| 1863.9712 | 932.4892  | 15 | A 7   | 779.3795  | 390.1934  |
| 1935.0083 | 968.0078  | 16 | A 6   | 708.3424  | 354.6748  |
| 2049.0512 | 1025.0292 | 17 | N 5   | 637.3052  | 319.1563  |
| 2163.0941 | 1082.0507 | 18 | N 4   | 523.2623  | 262.1348  |
| 2326.1575 | 1163.5824 | 19 | Y 3   | 409.2194  | 205.1133  |
| 2397.1946 | 1199.1009 | 20 | A 2   | 246.1561  | 123.5817  |
|           |           | 21 | R 1   | 175.1190  | 88.0631   |

[\[Click\]](#) to move table

Static Modifications:

C: 57.02146

Variable Modifications:

E: 156.1011



AQVHVSE E GGEPEAMLQVLGPKPALPEGTEDTAKEDAANR, MH+ 4327.1259, m/z 1082.5369

File: 080910WTPMA-11, Scan: 6387, Precursor m/z: 1082.7855, Charge: 4

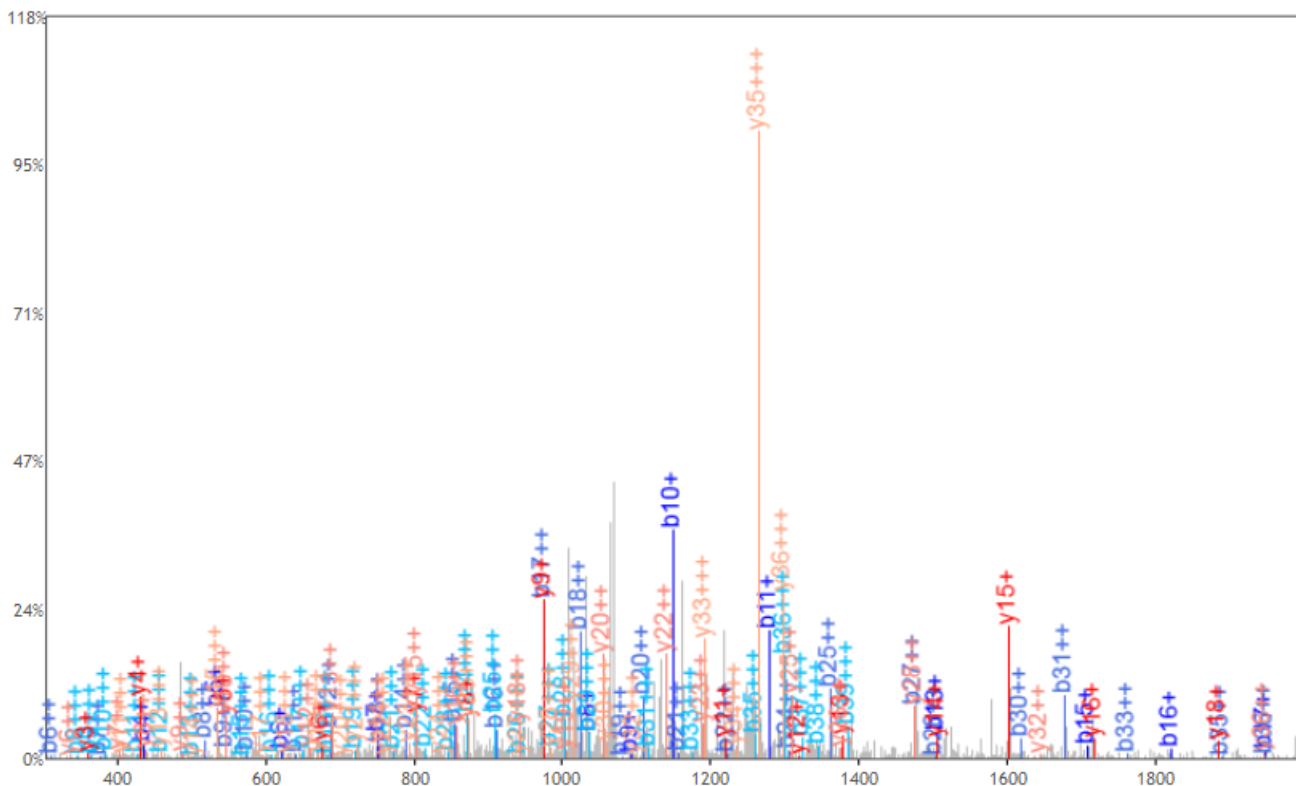

| b+        | b2+       | b3+       | #  | Seq # | y+ | y2+       | y3+       |
|-----------|-----------|-----------|----|-------|----|-----------|-----------|
| 72.0666   | 26.2258   | 24.6863   | 1  | A     | 40 |           |           |
| 200.1030  | 100.5551  | 67.3725   | 2  | Q     | 29 | 4254.0888 | 2128.5480 |
| 299.1714  | 150.0892  | 100.2992  | 2  | V     | 28 | 4128.0202 | 2044.5187 |
| 424.2202  | 218.4188  | 144.0814  | 4  | H     | 27 | 4028.9418 | 2014.9845 |
| 525.2987  | 248.1920  | 179.1044  | 5  | V     | 26 | 3891.9029 | 1948.4251 |
| 622.2207  | 311.4490  | 208.1151  | 6  | A     | 25 | 3792.8245 | 1894.9209 |
| 751.2722  | 374.1902  | 251.1292  | 7  | E     | 24 | 3705.8024 | 1852.4049 |
| 1024.2170 | 518.7421  | 344.1772  | 8  | E     | 22 | 3574.7299 | 1768.8824 |
| 1092.2285 | 547.2729  | 362.1842  | 9  | G     | 22 | 3291.6142 | 1648.2117 |
| 1150.2299 | 575.2824  | 384.1915  | 10 | G     | 21 | 3224.5947 | 1617.8010 |
| 1279.4025 | 640.2049  | 427.2027  | 11 | E     | 20 | 3177.5722 | 1589.2902 |
| 1276.4552 | 638.2122  | 429.2101  | 12 | P     | 20 | 3048.5204 | 1524.7490 |
| 1502.4979 | 752.2224  | 502.2708  | 12 | E     | 28 | 2951.4779 | 1474.2424 |
| 1576.7250 | 788.2711  | 524.2499  | 14 | A     | 27 | 2822.4252 | 1411.7212 |
| 1707.7725 | 854.2914  | 549.2520  | 15 | H     | 26 | 2751.2982 | 1374.2027 |
| 1820.8296 | 910.2224  | 607.2487  | 16 | L     | 25 | 2620.2577 | 1210.6825 |
| 1948.9181 | 974.2427  | 652.2109  | 17 | Q     | 24 | 2507.2724 | 1254.1484 |
| 2047.9844 | 1024.2449 | 682.2227  | 18 | V     | 22 | 2279.2120 | 1190.1112 |
| 2141.0704 | 1081.2289 | 721.2284  | 19 | L     | 22 | 2280.1484 | 1140.2770 |
| 2218.0921 | 1109.2497 | 740.2255  | 20 | G     | 21 | 2147.0824 | 1084.0249 |
| 2215.1448 | 1128.0741 | 772.2865  | 21 | P     | 20 | 2110.0411 | 1025.2242 |
| 2442.2298 | 1222.1225 | 815.0848  | 22 | K     | 19 | 2012.9882 | 1004.9978 |
| 2540.2924 | 1270.4499 | 847.4257  | 22 | P     | 18 | 1884.8924 | 942.9202  |
| 2611.2297 | 1204.1482 | 871.1147  | 24 | A     | 17 | 1787.8404 | 894.4229  |
| 2724.4227 | 1242.7105 | 908.2094  | 25 | L     | 16 | 1714.8025 | 854.9024  |
| 2821.4645 | 1411.2269 | 941.1494  | 26 | P     | 15 | 1602.7194 | 802.2424  |
| 2950.2091 | 1475.2582 | 984.1744  | 27 | E     | 14 | 1504.6467 | 752.6270  |
| 3007.2204 | 1504.2489 | 1022.1817 | 28 | G     | 13 | 1377.6241 | 689.2127  |
| 3108.2782 | 1554.7928 | 1024.8642 | 29 | T     | 12 | 1220.4024 | 640.8049  |
| 3227.4208 | 1619.2141 | 1079.8785 | 30 | E     | 11 | 1219.2249 | 610.2811  |
| 3252.4478 | 1674.2275 | 1118.2208 | 31 | D     | 10 | 1090.5122 | 545.7294  |
| 3452.4955 | 1727.2514 | 1151.9022 | 32 | T     | 9  | 972.4824  | 488.2142  |
| 3524.7224 | 1742.8499 | 1175.2824 | 32 | A     | 8  | 874.4277  | 427.7225  |
| 3652.8275 | 1824.9174 | 1218.2807 | 34 | K     | 7  | 802.4004  | 402.2029  |
| 3781.8701 | 1891.4287 | 1241.2949 | 35 | E     | 6  | 675.2024  | 328.1245  |
| 3894.8971 | 1948.9222 | 1299.4272 | 36 | D     | 5  | 544.2420  | 272.4252  |
| 3947.9242 | 1984.4707 | 1322.2162 | 37 | A     | 4  | 421.2241  | 214.2217  |
| 4028.9712 | 2019.9892 | 1344.9922 | 38 | A     | 3  | 240.1990  | 180.4021  |
| 4122.0142 | 2077.0108 | 1382.0294 | 39 | H     | 2  | 249.1419  | 145.0844  |
|           |           |           | 40 | R     | 1  | 175.1190  | 88.0421   |

AQVHVSEEGEPEAMLQVLGPKPALPEGTETDAKEDAANR, MH+ 4327.1259, m/z 1082.5369

File: 080910WTPMA-11, Scan: 6354, Precursor m/z: 1083.0355, Charge: 4

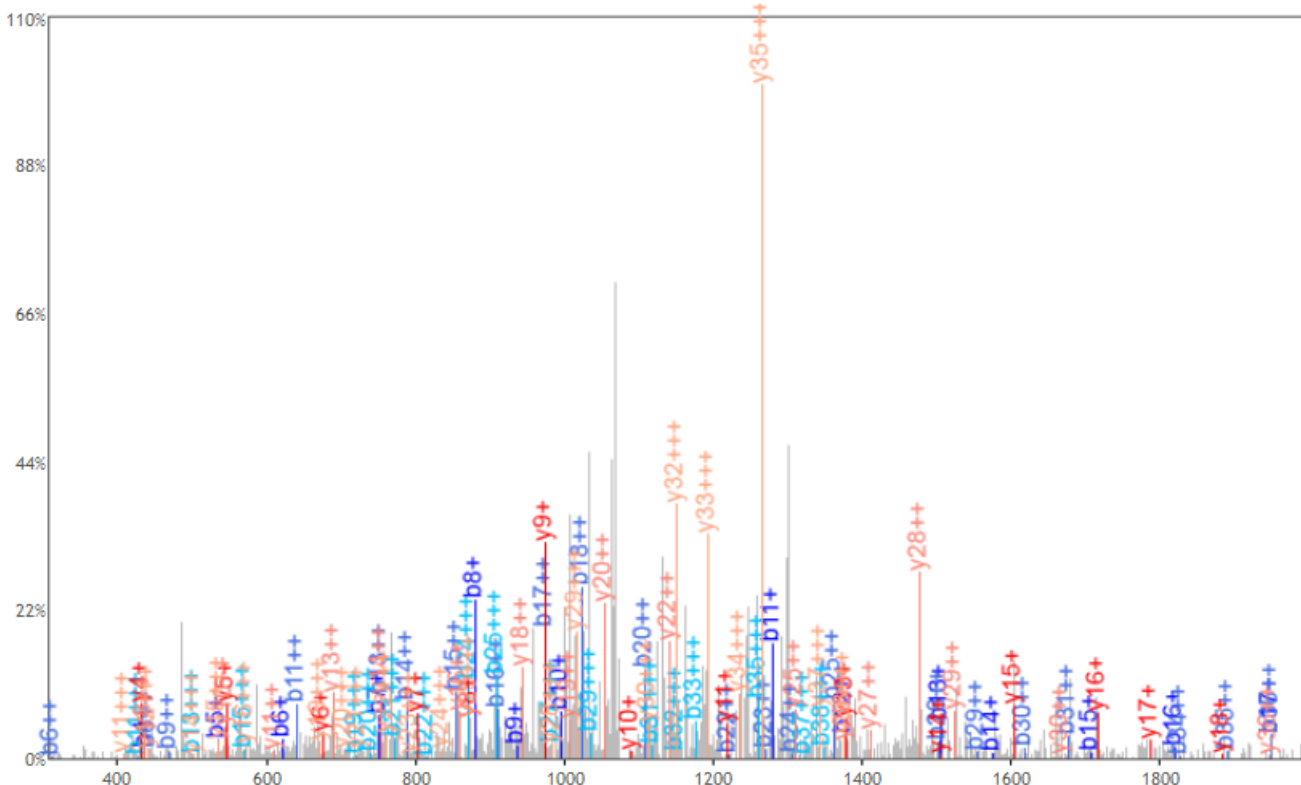

| b+        | b+        | b+        | #  | Seq # | y+        | y2+       | y3+       |
|-----------|-----------|-----------|----|-------|-----------|-----------|-----------|
| 72.0444   | 26.5259   | 24.4943   | 1  | A 40  |           |           |           |
| 100.1030  | 100.5551  | 67.3715   | 2  | Q 29  | 4256.0688 | 2128.5480 | 1419.3678 |
| 299.1714  | 150.0893  | 100.2923  | 3  | V 28  | 4128.0302 | 2064.2187 | 1376.4414 |
| 426.2303  | 218.4188  | 146.0814  | 4  | M 27  | 4028.9418 | 2014.9845 | 1343.4588 |
| 525.2987  | 268.1530  | 179.1044  | 5  | V 26  | 3891.9029 | 1948.4551 | 1297.9725 |
| 622.3307  | 311.4490  | 208.1151  | 6  | S 25  | 3792.8345 | 1896.9209 | 1264.9497 |
| 721.3733  | 376.1903  | 251.1293  | 7  | E 24  | 3705.8024 | 1852.4049 | 1232.9390 |
| 880.4159  | 460.7114  | 294.1425  | 8  | E 23  | 3576.7599 | 1788.8824 | 1192.9248 |
| 927.4274  | 499.2223  | 312.1504  | 9  | G 22  | 3447.7173 | 1726.2423 | 1149.9104 |
| 994.4588  | 497.7321  | 322.1578  | 10 | G 21  | 3290.6958 | 1695.8515 | 1120.9025 |
| 1279.4025 | 640.3049  | 427.3257  | 11 | E 20  | 3222.6743 | 1647.3408 | 1111.8943 |
| 1376.4553 | 688.8212  | 459.3564  | 12 | P 20  | 3048.5304 | 1524.7490 | 1016.8484 |
| 1505.4979 | 723.3524  | 502.3708  | 13 | E 18  | 2951.4779 | 1476.2424 | 984.4975  |
| 1576.7250 | 788.8711  | 526.2499  | 14 | A 27  | 2822.4253 | 1411.7212 | 941.4822  |
| 1707.7755 | 854.2914  | 549.9200  | 15 | M 26  | 2751.2492 | 1376.2027 | 917.8042  |
| 1820.8294 | 910.9234  | 607.4247  | 16 | L 25  | 2620.2577 | 1310.4425 | 874.1241  |
| 1948.9181 | 976.9427  | 650.2109  | 17 | Q 24  | 2507.2726 | 1256.1404 | 826.4294  |
| 2047.9866 | 1024.4949 | 682.2227  | 18 | V 22  | 2279.2150 | 1190.1112 | 792.7422  |
| 2141.0704 | 1081.0289 | 721.0284  | 19 | L 22  | 2280.1484 | 1140.5770 | 740.7204  |
| 2218.0921 | 1109.5097 | 740.0225  | 20 | G 21  | 2147.0424 | 1086.0349 | 722.0257  |
| 2215.1448 | 1158.0761 | 772.2445  | 21 | P 20  | 2110.0411 | 1025.5243 | 704.0186  |
| 2442.2298 | 1222.1225 | 815.0848  | 22 | K 19  | 2012.9882 | 1006.9978 | 671.4476  |
| 2540.2924 | 1270.6099 | 847.4257  | 23 | P 18  | 1884.8924 | 942.9502  | 628.9492  |
| 2611.3297 | 1306.1485 | 871.1147  | 24 | A 17  | 1787.8406 | 894.4229  | 594.4184  |
| 2724.4127 | 1362.7105 | 908.8094  | 25 | L 16  | 1716.8025 | 858.9054  | 572.9242  |
| 2821.4445 | 1411.2269 | 941.1404  | 26 | P 15  | 1602.7194 | 802.2624  | 522.2447  |
| 2950.5091 | 1475.7582 | 984.1744  | 27 | E 14  | 1506.6447 | 752.8270  | 502.8924  |
| 3007.5204 | 1504.2689 | 1002.1817 | 28 | G 12  | 1277.4241 | 649.2157  | 459.8795  |
| 3108.5782 | 1554.7928 | 1026.8443 | 29 | T 12  | 1220.4024 | 640.8049  | 440.8724  |
| 3227.6208 | 1619.2141 | 1079.8765 | 30 | E 11  | 1219.5549 | 610.2411  | 407.1498  |
| 3252.4478 | 1676.8275 | 1118.2208 | 31 | D 10  | 1090.5123 | 545.7594  | 344.1754  |
| 3452.4495 | 1727.2514 | 1151.9022 | 32 | T 9   | 975.4854  | 488.2443  | 325.8222  |
| 3524.7224 | 1762.8499 | 1175.5824 | 33 | A 8   | 876.4277  | 427.7225  | 292.1508  |
| 3652.8275 | 1824.9174 | 1218.2407 | 34 | K 7   | 802.4004  | 402.2029  | 248.4717  |
| 3781.8701 | 1891.4287 | 1241.2949 | 35 | E 6   | 675.2054  | 328.1545  | 225.7724  |
| 3894.8971 | 1948.9222 | 1299.4372 | 36 | D 5   | 546.2420  | 272.4252  | 182.7592  |
| 3947.9242 | 1984.4707 | 1322.2142 | 37 | A 4   | 421.2241  | 216.1217  | 144.4149  |
| 4028.9712 | 2019.9892 | 1344.9952 | 38 | A 3   | 240.1990  | 180.4021  | 120.7278  |
| 4152.0142 | 2077.0108 | 1385.0094 | 39 | H 2   | 289.1419  | 145.0844  | 97.0588   |
|           |           |           | 40 | R 1   | 175.1190  | 88.0421   | 59.0445   |

KLEGDSTLSDQIAELQAQIA **E**LK, MH+ 2771.4421, m/z 924.4856

File: 080910WTPMA-11, Scan: 9804, Precursor m/z: 924.82, Charge: 3

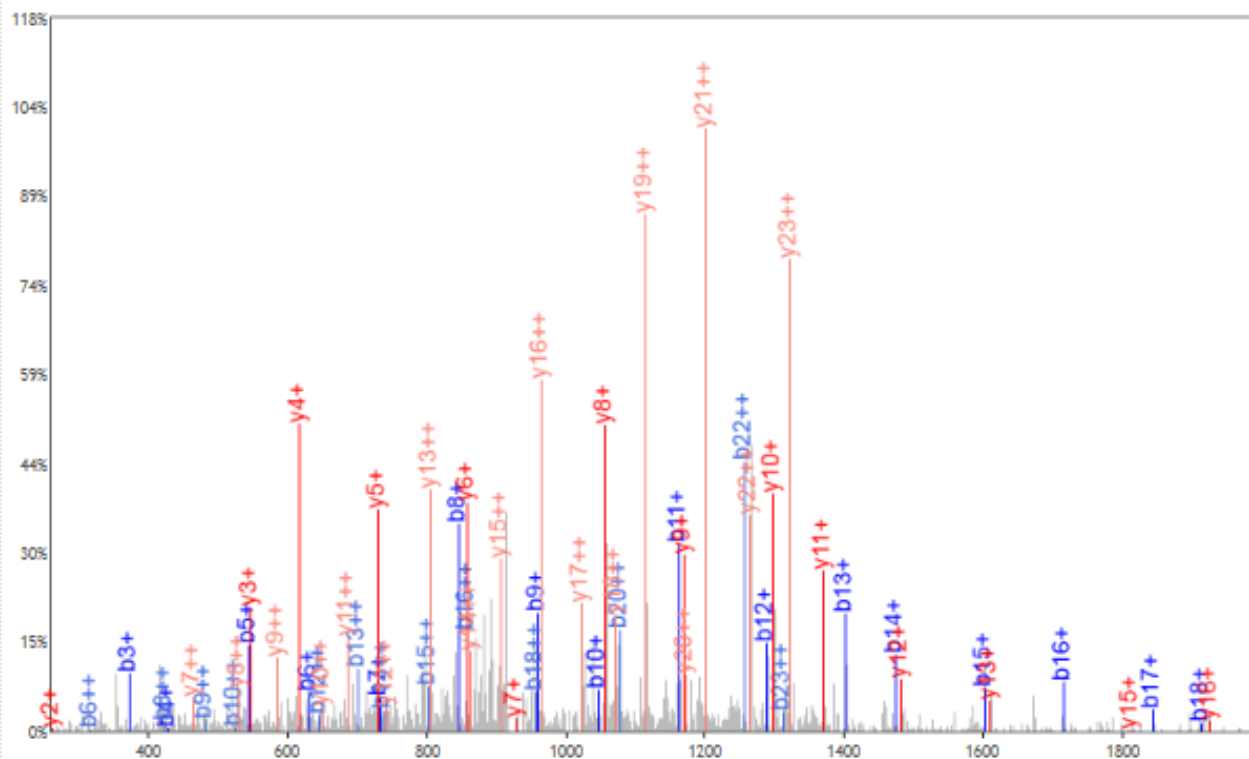

| b+        | b2+       | #  | Seq # | y+        | y2+       |
|-----------|-----------|----|-------|-----------|-----------|
| 129.1022  | 65.0548   | 1  | K 24  |           |           |
| 242.1863  | 121.5968  | 2  | L 23  | 2643.3472 | 1322.1772 |
| 371.2289  | 186.1181  | 3  | E 22  | 2530.2631 | 1265.6352 |
| 428.2504  | 214.6288  | 4  | G 21  | 2401.2205 | 1201.1139 |
| 543.2773  | 272.1423  | 5  | D 20  | 2344.1990 | 1172.6032 |
| 630.3093  | 315.6583  | 6  | S 19  | 2229.1721 | 1115.0897 |
| 731.3570  | 366.1821  | 7  | T 18  | 2142.1401 | 1071.5737 |
| 846.3840  | 423.6956  | 8  | D 17  | 2041.0924 | 1021.0498 |
| 959.4680  | 480.2376  | 9  | L 16  | 1926.0655 | 963.5364  |
| 1046.5000 | 523.7537  | 10 | S 15  | 1812.9814 | 906.9943  |
| 1161.5270 | 581.2671  | 11 | D 14  | 1725.9494 | 863.4783  |
| 1289.5856 | 645.2964  | 12 | Q 13  | 1610.9224 | 805.9648  |
| 1402.6696 | 701.8385  | 13 | I 12  | 1482.8638 | 741.9356  |
| 1473.7067 | 737.3570  | 14 | A 11  | 1369.7798 | 685.3935  |
| 1602.7493 | 801.8783  | 15 | E 10  | 1298.7427 | 649.8750  |
| 1715.8334 | 858.4203  | 16 | L 9   | 1169.7001 | 585.3537  |
| 1843.8920 | 922.4496  | 17 | Q 8   | 1056.6160 | 528.8116  |
| 1914.9291 | 957.9682  | 18 | A 7   | 928.5574  | 464.7824  |
| 2042.9877 | 1021.9975 | 19 | Q 6   | 857.5203  | 429.2638  |
| 2156.0717 | 1078.5395 | 20 | I 5   | 729.4617  | 365.2345  |
| 2227.1088 | 1114.0581 | 21 | A 4   | 616.3777  | 308.6925  |
| 2512.2525 | 1256.6299 | 22 | E 3   | 545.3406  | 273.1739  |
| 2625.3366 | 1313.1719 | 23 | L 2   | 260.1969  | 130.6021  |
|           |           | 24 | K 1   | 147.1128  | 74.0600   |

[\[Click\]](#) to move table

Static Modifications:

C: 57.02146

Variable Modifications:

E: 156.1011
